# Supplementary material
Source: PubMed Central journal article supplement (PMC8602144)
Supplement: 40265_2021_1618_MOESM2_ESM.pdf [file 40265_2021_1618_MOESM2_ESM.pdf]

## Online Supplementary Information 2

**Article title:** Clinical value of emerging bioanalytical methods for drug monitoring: a scoping review of their applicability for medication adherence and therapeutic drug monitoring

**Journal name:** Drugs

**Author names:** Tanja R. Zijl<sup>1</sup>, Zamrotul Izzah<sup>1,2,3</sup>, Christoffer Åberg<sup>3</sup>, C.Tji. Gan<sup>4</sup>, Stephan.J.L. Bakker<sup>5</sup>, Daan J. Touw<sup>1,3,6</sup>, Job F.M. van Boven<sup>1,6</sup>

1. University of Groningen, University Medical Center Groningen, Department of Clinical Pharmacy & Pharmacology, Groningen, The Netherlands

2. Universitas Airlangga, Faculty of Pharmacy, Department of Pharmacy Practice, Surabaya, Indonesia

3. University of Groningen, Groningen Institute of Pharmacy, Department of Pharmaceutical Analysis, Groningen, The Netherlands

4. University of Groningen, University Medical Center Groningen, Respiratory Diseases and Lung Transplantation, Groningen, The Netherlands

5. University of Groningen, University Medical Center Groningen, Department of Internal Medicine, Division of Nephrology, Groningen, The Netherlands

6. Medication Adherence Expertise Center of the Northern Netherlands (MAECON), Groningen, The Netherlands

**Corresponding author:** Daan J. Touw; [d.j.touw@umcg.nl](mailto:d.j.touw@umcg.nl)

### Search strategy details

|                |                                                                                                                                                                                                                                                                                                                                                                                                                                                                          |
|----------------|--------------------------------------------------------------------------------------------------------------------------------------------------------------------------------------------------------------------------------------------------------------------------------------------------------------------------------------------------------------------------------------------------------------------------------------------------------------------------|
| Database       | <b>PubMed</b>                                                                                                                                                                                                                                                                                                                                                                                                                                                            |
| Date of search | 12 February 2020 and 10 March 2021                                                                                                                                                                                                                                                                                                                                                                                                                                       |
| Query          | (hair*[ti] OR urine[ti] OR saliva[ti] OR oral fluid*[ti] OR dried blood spot*[ti]) AND ("analysis" [Subheading] OR analy*[tiab] OR concentrat*[tiab] OR "Biological Assay"[Mesh] OR assay*[tiab] OR quanti*[tiab] OR measurement[tiab] OR level[tiab]) AND ("Patient Compliance"[Mesh] OR adheren*[tiab] OR complian*[tiab] OR non-adheren*[tiab] OR nonadheren*[tiab] OR non-complian*[tiab] OR noncomplian*[tiab] OR "Drug Monitoring"[Mesh] OR drug monitoring[tiab]) |
| Limits         | Publication years: 2000 – 2020; Language: English                                                                                                                                                                                                                                                                                                                                                                                                                        |
| Results        | 1,049+116 = 1,165                                                                                                                                                                                                                                                                                                                                                                                                                                                        |

|                |                                                                                                                                                                                                                                                                                                                                                                                                                                                       |
|----------------|-------------------------------------------------------------------------------------------------------------------------------------------------------------------------------------------------------------------------------------------------------------------------------------------------------------------------------------------------------------------------------------------------------------------------------------------------------|
| Database       | <b>Embase</b>                                                                                                                                                                                                                                                                                                                                                                                                                                         |
| Date of search | 12 February 2020 and 10 March 2021                                                                                                                                                                                                                                                                                                                                                                                                                    |
| Query          | (hair:ti OR urine:ti OR saliva:ti OR 'oral fluid*':ti OR 'dried blood spot*':ti) AND ('bioassay'/exp OR analy*:ab,ti OR concentrat*:ab,ti OR monitor*:ab,ti OR assay*:ab,ti OR quanti*:ab,ti OR measurement:ab,ti OR level:ab,ti) AND ('patient compliance'/exp OR adheren*:ab,ti OR complian*:ab,ti OR 'non-adheren*':ab,ti OR nonadheren*:ab,ti OR 'non-complian*':ab,ti OR noncomplian*:ab,ti OR 'drug monitoring'/exp OR 'drug monitoring':ab,ti) |
| Limits         | Publication years: 2000 – 2020; Language: English                                                                                                                                                                                                                                                                                                                                                                                                     |
| Results        | 1,410+158 = 1,568                                                                                                                                                                                                                                                                                                                                                                                                                                     |

|                |                                                                                                                                                                                                                                                               |
|----------------|---------------------------------------------------------------------------------------------------------------------------------------------------------------------------------------------------------------------------------------------------------------|
| Database       | <b>Web of Science</b>                                                                                                                                                                                                                                         |
| Date of search | 12 February 2020 and 10 March 2021                                                                                                                                                                                                                            |
| Query          | TI=(hair OR urine OR saliva OR oral fluid OR dried blood spot) AND TS=(analysis OR concentrat* OR assay OR quanti* OR measurement OR level) AND TS=(adheren* OR complian* OR non-adheren* OR nonadheren* OR non-complian* OR noncomplian* OR drug monitoring) |
| Limits         | Publication years: 2000 – 2020; Language: English                                                                                                                                                                                                             |
| Results        | 1,683+174 = 1,857                                                                                                                                                                                                                                             |
