# Supplementary material
Source: PubMed Central journal article supplement (PMC8602144)
Supplement: 40265_2021_1618_MOESM3_ESM.pdf [file 40265_2021_1618_MOESM3_ESM.pdf]

### **Online Supplementary Information 3**

**Article title:** Clinical value of emerging bioanalytical methods for drug monitoring: a scoping review of their applicability for medication adherence and therapeutic drug monitoring

**Journal name:** Drugs

**Author names:** Tanja R. Zijp<sup>1</sup>, Zamrotul Izzah<sup>1,2,3</sup>, Christoffer Åberg<sup>3</sup>, C.Tji. Gan<sup>4</sup>, Stephan.J.L. Bakker<sup>5</sup>, Daan J. Touw<sup>1,3,6</sup>, Job F.M. van Boven<sup>1,6</sup>

1. University of Groningen, University Medical Center Groningen, Department of Clinical Pharmacy & Pharmacology, Groningen, The Netherlands

2. Universitas Airlangga, Faculty of Pharmacy, Department of Pharmacy Practice, Surabaya, Indonesia

3. University of Groningen, Groningen Institute of Pharmacy, Department of Pharmaceutical Analysis, Groningen, The Netherlands

4. University of Groningen, University Medical Center Groningen, Respiratory Diseases and Lung Transplantation, Groningen, The Netherlands

5. University of Groningen, University Medical Center Groningen, Department of Internal Medicine, Division of Nephrology, Groningen, The Netherlands

6. Medication Adherence Expertise Center of the Northern Netherlands (MAECON), Groningen, The Netherlands

**Corresponding author:** Daan J. Touw; d.j.touw@umcg.nl

**Table 1. Overview of all included studies**

| <b>Reported field</b>  | <b>Study</b>               | <b>Continent</b> | <b>Study population</b>                                                                                                                                                                                 | <b>Matrix measured</b> | <b>Analytical method</b> | <b>Drugs evaluated</b>                                                                   | <b>Clinical applicability</b> |
|------------------------|----------------------------|------------------|---------------------------------------------------------------------------------------------------------------------------------------------------------------------------------------------------------|------------------------|--------------------------|------------------------------------------------------------------------------------------|-------------------------------|
| Asthma/<br>COPD        | Salamzadeh et al., 2008[1] | Asia             | Adult patients with asthma and COPD; N=86                                                                                                                                                               | Saliva*                | HPLC                     | theophylline                                                                             | TDM                           |
| Asthma/<br>COPD        | Hassall et al., 2018[2]    | Europe           | Adults with stable COPD and/or asthma; N=200                                                                                                                                                            | Hair                   | LC-MS/MS                 | formoterol                                                                               | Adherence                     |
| Cardiovascular disease | Peeters et al., 2019[3]    | Europe           | Outpatients from internal medicine, cardiology, and nephrology clinics; N=135                                                                                                                           | DBS*                   | UHPLC-MS/MS              | enalapril, perindopril, losartan, valsartan, hydrochlorothiazide, amlodipine, nifedipine | Adherence                     |
| Cardiovascular disease | Foerster et al., 2018[4]   | Europe           | Patients (=18 years), regularly treated with apixaban, dabigatran, edoxaban, or rivaroxaban; N=33                                                                                                       | DBS*                   | UPLC-MS/MS               | rivaroxaban                                                                              | TDM                           |
| Cardiovascular disease | Zalzstein et al., 2003[5]  | Asia             | Infants, children, and adolescents attending the paediatric cardiology unit and receiving digoxin for a variety of indication; N=18                                                                     | Saliva*                | FPIA                     | digoxin                                                                                  | TDM                           |
| Cardiovascular disease | Enderle et al., 2015[6]    | Europe           | Outpatients with pulmonary arterial hypertension or chronic thromboembolic pulmonary hypertension, receiving stable doses of tadalafil, sildenafil, ambrisentan, or bosentan for at least 4 weeks; N=84 | DBS*                   | LC-MS/MS                 | sildenafil, tadalafil, ambrisentan, bosentan                                             | TDM                           |
| Cardiovascular disease | Ghimenti et al., 2011[7]   | Europe           | Adult patients on warfarin therapy treated for atrial fibrillation, deep vein thrombosis, pulmonary embolism, and others; N=50                                                                          | Saliva*                | HPLC                     | warfarin                                                                                 | TDM                           |
| Cardiovascular disease | Lomonaco et al., 2014[8]   | Europe           | Adult patients with atrial fibrillation, deep vein thrombosis, or mechanical or biological heart                                                                                                        | Saliva*                | HPLC                     | warfarin                                                                                 | TDM                           |

| Reported field         | Study                          | Continent     | Study population                                                                                                                                      | Matrix measured   | Analytical method | Drugs evaluated                                                                                                      | Clinical applicability |
|------------------------|--------------------------------|---------------|-------------------------------------------------------------------------------------------------------------------------------------------------------|-------------------|-------------------|----------------------------------------------------------------------------------------------------------------------|------------------------|
| Cardiovascular disease | Richter et al., 2019[9]        | Europe        | valve bearers undergoing warfarin therapy;<br>N=14<br>Hypertensive patients taking regularly cardiovascular drugs;<br>N=57                            | Saliva and Urine* | LC-MS/MS          | amlodipine, bisoprolol, spironolactone, hydrochlorothiazide, metoprolol, moxonidine, ramipril, torasemide, valsartan | Adherence              |
| Chronic hyposmia       | Henkin et al., 2012[10]        | North America | Adult patients with smell loss (hyposmia) treated with oral theophylline;<br>N=23                                                                     | Saliva*           | FPIA              | theophylline                                                                                                         | TDM                    |
| Chronic migraine       | Ferrari et al., 2016[11]       | Europe        | Adults diagnosed with chronic migraine with self-reported triptan use;<br>N=147                                                                       | Hair              | LC-MS/MS          | almotriptan, eletriptan, frovatriptan, rizatriptan, sumatriptan                                                      | Adherence              |
| Chronic migraine       | Ferrari et al., 2017[12]       | Europe        | Primary headache patients with daily treatment for at least 3 months;<br>N=93                                                                         | Hair              | LC-MS/MS          | amitriptyline, citalopram, cloxazolam, duloxetine, topiramate                                                        | Adherence              |
| Diabetes               | Scherf-Clavel et al., 2019[13] | Europe        | Adult patients with type 2 diabetes mellitus receiving a therapy with metformin and/or sitagliptin as fixed dose combination or monotherapy;<br>N=154 | DBS*              | HPLC              | metformin, sitagliptin                                                                                               | TDM                    |
| Epilepsy               | Guo et al., 2019[14]           | Asia          | Epilepsy patients, aged 4 to 87years;<br>N=29                                                                                                         | DBS               | GC-MS             | valproic acid                                                                                                        | TDM                    |
| Epilepsy               | Brandt et al., 2018[15]        | Europe        | Adult epileptic inpatients prescribed lacosamide;<br>N=25                                                                                             | Saliva*           | -                 | lacosamide                                                                                                           | TDM                    |

| <b>Reported field</b> | <b>Study</b>                    | <b>Continent</b> | <b>Study population</b>                                                                                                                    | <b>Matrix measured</b> | <b>Analytical method</b> | <b>Drugs evaluated</b>                    | <b>Clinical applicability</b> |
|-----------------------|---------------------------------|------------------|--------------------------------------------------------------------------------------------------------------------------------------------|------------------------|--------------------------|-------------------------------------------|-------------------------------|
| Epilepsy              | Maldonado et al., 2008[16]      | South America    | Children treated for epilepsy, aged from 1 to 14 years; N=103                                                                              | Saliva                 | FPIA                     | carbamazepine, valproic acid              | TDM                           |
| Epilepsy              | Tsatsakis et al., 2000[17]      | Europe           | Patients (aged 5 to 69 years) with epilepsy, using PHT for 2 months to several years; N=60                                                 | Hair*                  | HPLC FPIA                | phenytoin                                 | Adherence                     |
| Epilepsy              | Williams et al., 2002[18]       | Europe           | 26 pregnant women and 13 non-pregnant female controls with epilepsy; N=39                                                                  | Hair                   | HPLC                     | carbamazepine, lamotrigine                | Adherence                     |
| Epilepsy              | Karas-Ruszczuk et al., 2017[19] | Europe           | Outpatients and inpatients, have a 3-month history of stable Levetiracetam dosing;; N=51                                                   | Saliva and Hair*       | LC-MS/MS                 | levetiracetam                             | TDM and Adherence             |
| Epilepsy              | Williams et al., 2001[20]       | Europe           | Closely supervised adult inpatients with epilepsy; N=37                                                                                    | Hair*                  | HPLC                     | carbamazepine                             | Adherence                     |
| Epilepsy              | Rhoden et al., 2014[21]         | South America    | Patients from a neurology service affiliated to a public health care center, using valproic acid; N=17                                     | DBS*                   | GC-MS                    | valproic acid                             | TDM                           |
| Epilepsy              | Mecarelli et al., 2007[22]      | Europe           | Adult epileptic patients, taking levetiracetam as monotherapy or add-on therapy with other antiepileptic drugs for at least 3 months; N=30 | Saliva*                | GC-MS                    | levetiracetam                             | TDM                           |
| Epilepsy              | Grim et al., 2003[23]           | North America    | Children and adults patients with epilepsy who attended the neurology clinic and treated with levetiracetam for a minimum of 4 weeks; N=40 | Saliva*                | HPLC                     | levetiracetam                             | TDM                           |
| Epilepsy              | Linder et al., 2017[24]         | Europe           | Children and adolescents aged 2 to 18 years and treated with carbamazepine, lamotrigine, or valproic acid as a single or                   | DBS*                   | LC-MS/MS                 | carbamazepine, lamotrigine, valproic acid | TDM                           |

| Reported field | Study                        | Continent     | Study population                                                                                                                                                                            | Matrix measured  | Analytical method                            | Drugs evaluated                                          | Clinical applicability |
|----------------|------------------------------|---------------|---------------------------------------------------------------------------------------------------------------------------------------------------------------------------------------------|------------------|----------------------------------------------|----------------------------------------------------------|------------------------|
| Epilepsy       | Dwivedi et al., 2015[25]     | Asia          | combined therapy;<br>N=46<br>Epileptic patients aged = 65 years taking either valproic acid alone or in combination for minimum 3 months;                                                   | Saliva*          | HPLC                                         | valproic acid                                            | TDM                    |
| Epilepsy       | Greenaway et al., 2011[26]   | Europe        | N=65<br>Epileptic patients treated with lacosamide as add-on therapy for at least 1 month;                                                                                                  | Saliva*          | HPLC                                         | lacosamide                                               | TDM                    |
| Epilepsy       | Kaewdoun et al., 2015[27]    | Asia          | N=98<br>Epileptic outpatients aged 15 to 60 years old receiving carbamazepine monotherapy or in combination with other antiepileptic drugs for at least 1 month;                            | Saliva*          | Fluorescence polarization immunoassay (FPIA) | carbamazepine                                            | TDM                    |
| Epilepsy       | Tsiropoulos et al., 2000[28] | Europe        | N=42<br>Epileptic outpatients aged more than 14 years receiving stable doses of lamotrigine and comedication for at least 14 days;                                                          | Saliva*          | HPLC                                         | lamotrigine                                              | TDM                    |
| Epilepsy       | Kuczynska et al., 2019[29]   | Europe        | N=40<br>Epileptic patients on stable drug dosing for 3 months;                                                                                                                              | Saliva and Hair* | LC-MS/MS                                     | lamotrigine                                              | TDM and Adherence      |
| Epilepsy       | Shah et al., 2013[30]        | Europe        | N=85<br>Children (0.9-17 years) with epilepsy;                                                                                                                                              | DBS              | GC HPLC                                      | valproic acid, levetiracetam, carbamazepine, lamotrigine | Adherence              |
| Epilepsy       | Li et al., 2016[31]          | Asia          | N=102<br>Inpatient and outpatient epileptic patients in the Pediatric Departments at the hospital taking oxcarbazepine as monotherapy or adjunctive therapy with other antiepileptic drugs; | Saliva*          | HPLC                                         | oxcarbazepine                                            | TDM                    |
| Epilepsy       | Miles et al., 2003[32]       | North America | N=52<br>Epilepsy patients (2.5 to 25 years) attending the neurology clinic and                                                                                                              | Saliva*          | FPIA                                         | topiramate                                               | TDM                    |

| Reported field | Study                     | Continent     | Study population                                                                                                                                                                                                                               | Matrix measured | Analytical method         | Drugs evaluated                                          | Clinical applicability |
|----------------|---------------------------|---------------|------------------------------------------------------------------------------------------------------------------------------------------------------------------------------------------------------------------------------------------------|-----------------|---------------------------|----------------------------------------------------------|------------------------|
| Epilepsy       | Dordevic et al., 2009[33] | Europe        | taking a constant dose of topiramate for at least 1 week;<br>N=31<br>Epileptic patients on carbamazepine therapy at the clinic;                                                                                                                | Saliva*         | HPLC                      | carbamazepine                                            | TDM                    |
| Epilepsy       | Ryan et al., 2003[34]     | North America | N=23<br>Epilepsy patients (2 to 46 years) attending the neurology clinic and taking lamotrigine;                                                                                                                                               | Saliva*         | HPLC                      | lamotrigine                                              | TDM                    |
| Epilepsy       | Linder et al., 2019[35]   | Europe        | N=31<br>Children (2-18 years) with epilepsy;                                                                                                                                                                                                   | DBS*            | LC-MS/MS                  | carbamazepine, lamotrigine, levetiracetam, valproic acid | TDM and Adherence      |
| Epilepsy       | Kongrit et al., 2014[36]  | Asia          | N=135<br>Outpatients aged 17 to 56 years with epilepsy and received topiramate either monotherapy or combination therapy with other antiepileptic drugs for at least 1 month;                                                                  | Saliva*         | turbidimetric immunoassay | topiramate                                               | TDM                    |
| Epilepsy       | Dwivedi et al., 2016[37]  | Asia          | N=26<br>Paediatric and adult outpatients (= 65 years) with epilepsy taking either of carbamazepine, phenytoin, phenobarbital alone or in combinations for a minimum of three months and their drug dosage reached to maximum tolerable levels; | Saliva*         | HPLC                      | carbamazepine, phenytoin, phenobarbital                  | TDM                    |
| Epilepsy       | Hamdan et al., 2017[38]   | Asia          | N=116<br>Paediatric outpatients (=18 years) diagnosed with epilepsy and had been prescribed levetiracetam for at least one month;                                                                                                              | Saliva*         | HPLC                      | levetiracetam                                            | TDM and Adherence      |
| Epilepsy       | Kim et al., 2020[39]      | Asia          | N=15<br>Epileptic adult patients taking perampanel and whose dose was not changed for 2-3 weeks;                                                                                                                                               | Saliva*         | LC-MS/MS                  | perampanel                                               | TDM                    |

| Reported field     | Study                        | Continent     | Study population                                                                                                                                                                                                                                                         | Matrix measured | Analytical method                | Drugs evaluated         | Clinical applicability |
|--------------------|------------------------------|---------------|--------------------------------------------------------------------------------------------------------------------------------------------------------------------------------------------------------------------------------------------------------------------------|-----------------|----------------------------------|-------------------------|------------------------|
| Epilepsy           | Franco et al., 2020[40]      | Europe        | N=30<br>Pediatric and adult patients with epilepsy receiving rufinamide as part of routine clinical management and being at steady state dose, at least 48 hours after the last rufinamide dose change (at least 96 hours for patients co-medicated with valproic acid); | Saliva*         | HPLC                             | rufinamide              | TDM                    |
| (Haemato)-Oncology | Willemsen et al., 2018[41]   | Europe        | N=26<br>Patients with any type of solid tumour;                                                                                                                                                                                                                          | DBS*            | UPLC-MS/MS                       | everolimus              | TDM                    |
| (Haemato)-Oncology | Braal et al., 2019[42]       | Europe        | N=22<br>Adult lung cancer patients;                                                                                                                                                                                                                                      | Hair*           | LC-MS/MS                         | erlotinib               | TDM                    |
| (Haemato)-Oncology | Antunes et al., 2015[43]     | South America | N=10<br>Adult patients with breast cancer;                                                                                                                                                                                                                               | DBS*            | UHPLC-MS/MS                      | tamoxifen               | TDM                    |
| (Haemato)-Oncology | Maring et al., 2009[44]      | Europe        | N=91<br>Adults with advanced non-small cell lung cancer;                                                                                                                                                                                                                 | Saliva*         | HPLC                             | gemcitabine, epirubicin | TDM                    |
| (Haemato)-Oncology | Boucaud et al., 2003[45]     | Europe        | N=12<br>Adults with metastatic epithelial ovarian cancer;                                                                                                                                                                                                                | Saliva*         | HPLC with fluorescence detection | topotecan               | TDM                    |
| (Haemato)-Oncology | Boons et al., 2017[46]       | Europe        | N=13<br>Adult patients (18 years or older) with CML on treatment with 300 mg nilotinib twice daily;                                                                                                                                                                      | DBS*            | LC-MS/MS                         | nilotinib               | TDM                    |
| (Haemato)-Oncology | de Wit et al., 2015[47]      | Europe        | N=20<br>Patients =18 years with progressive disease from an advanced solid tumour;                                                                                                                                                                                       | DBS*            | LC-MS/MS                         | pazopanib               | TDM                    |
| (Haemato)-Oncology | Capron et al., 2016[48]      | South America | N=12<br>Adult patients with chronic myeloid leukemia with imatinib treatment for >4 months;                                                                                                                                                                              | Hair*           | LC-MS/MS                         | imatinib                | Adherence              |
| (Haemato)-Oncology | Andriguetti et al., 2018[49] | South America | N=102<br>Outpatients prescribed with paclitaxel as a single chemotherapy or in combination with other                                                                                                                                                                    | DBS*            | LC-MS/MS                         | paclitaxel              | TDM                    |

| Reported field     | Study                       | Continent     | Study population                                                                                                                                                                            | Matrix measured | Analytical method | Drugs evaluated                              | Clinical applicability |
|--------------------|-----------------------------|---------------|---------------------------------------------------------------------------------------------------------------------------------------------------------------------------------------------|-----------------|-------------------|----------------------------------------------|------------------------|
| (Haemato)-Oncology | Raymundo et al., 2018[50]   | South America | chemotherapy drugs (carboplatin, gemcitabine, cisplatin, trastuzumab);<br>N=34<br>Adults with prostate, breast, or lung cancer;<br>N=31                                                     | DBS*            | LC-MS/MS          | docetaxel                                    | TDM                    |
| (Haemato)-Oncology | Jager et al., 2014[51]      | Europe        | Female patients who underwent surgical treatment for early, ER-positive breast cancer, and subsequently received adjuvant tamoxifen for at least 2 months at the outpatient clinic;<br>N=50 | DBS*            | LC-MS/MS          | tamoxifen                                    | TDM                    |
| (Haemato)-Oncology | Lee et al., 2020[52]        | Asia          | Outpatients aged 20 to 70 years with stable doses of radotinib taken at least for a week for the treatment of CML in chronic phase;<br>N=50                                                 | DBS*            | LC-MS             | radotinib                                    | TDM                    |
| (Haemato)-Oncology | Dillenburg et al., 2020[53] | South America | Prostate cancer patients;<br>N=10                                                                                                                                                           | DBS*            | LC-MS/MS          | abiraterone                                  | TDM                    |
| (Haemato)-Oncology | Antunes et al., 2015[54]    | South America | Adult patients on chronic myeloid leukemia treatment with imatinib for at least 4 months;<br>N=50                                                                                           | DBS*            | LC-MS/MS          | imatinib                                     | TDM                    |
| HIV/AIDS           | Courlet et al., 2019[55]    | Europe        | HIV patients participating in the Swiss HIV Cohort Study (SHCS) #815 study;<br>N=73                                                                                                         | Saliva*         | LC-MS/MS          | emtricitabine, lamivudine                    | Adherence              |
| HIV/AIDS           | Wu et al., 2018[56]         | Asia          | Female HIV positive patients, using lamivudine, tenofovir, or nevirapine over the past 12 months;<br>N=33                                                                                   | Hair            | LC-MS/MS          | lamivudine, tenofovir disoproxil, nevirapine | Adherence              |
| HIV/AIDS           | Kromdijk et al., 2012[57]   | Europe        | HIV infected adults;<br>N=80                                                                                                                                                                | DBS*            | LC-MS/MS          | nevirapine, efavirenz                        | TDM                    |
| HIV/AIDS           | Alcaide et al., 2017[58]    | Africa        | HIV-infected women at week 32 of pregnancy;<br>N=392                                                                                                                                        | DBS             | LC-MS/MS          | tenofovir disoproxil, lamivudine,            | Adherence              |



| <b>Reported field</b> | <b>Study</b>                 | <b>Continent</b> | <b>Study population</b>                                                                                       | <b>Matrix measured</b> | <b>Analytical method</b> | <b>Drugs evaluated</b>                    | <b>Clinical applicability</b> |
|-----------------------|------------------------------|------------------|---------------------------------------------------------------------------------------------------------------|------------------------|--------------------------|-------------------------------------------|-------------------------------|
| HIV/AIDS              | Van Zyl et al., 2011[59]     | Africa           | HIV infected adults on second-line treatment with lopinavir/ritonavir; N=93                                   | Hair*                  | LC-MS/MS                 | efavirenz<br>lopinavir                    | Adherence                     |
| HIV/AIDS              | Gandhi et al., 2015[60]      | North America    | HIV-negative men who have sex with men and transgender women, enrolled in 3 prep trials; N=217                | DBS and Hair           | LC-MS/MS                 | tenofovir<br>disoproxil,<br>emtricitabine | Adherence                     |
| HIV/AIDS              | Yamada et al., 2017[61]      | Asia             | HIV-1-infected outpatients, treated with abacavir, tenofovir, darunavir, raltegravir at least 1 month; N=30   | Saliva*                | LC-MS/MS                 | abacavir, tenofovir<br>disoproxil         | TDM                           |
| HIV/AIDS              | Bernard et al., 2002[62]     | Europe           | HIV infected patients on HAART; N=89                                                                          | Hair                   | HPLC                     | indinavir                                 | TDM                           |
| HIV/AIDS              | Duval et al., 2007[63]       | Europe           | HIV infected patients; N=43                                                                                   | Hair*                  | HPLC                     | indinavir                                 | TDM                           |
| HIV/AIDS              | Gandhi et al., 2009[64]      | North America    | Women with HIV initiating protease inhibitor therapy; N=224                                                   | Hair                   | LC-MS/MS                 | lopinavir, atazanavir                     | TDM and Adherence             |
| HIV/AIDS              | Gras et al., 2011[65]        | Africa           | Adult HIV patients being treated with zidovudine, lamivudine, and nevirapine; N=29                            | Saliva*                | LC-MS                    | zidovudine,<br>lamivudine,<br>nevirapine  | Adherence                     |
| HIV/AIDS              | Gandhi et al., 2011[66]      | North America    | HIV infected and at-risk non-infected women; N=424                                                            | Hair                   | LC-MS/MS                 | atazanavir, ritonavir                     | TDM                           |
| HIV/AIDS              | Hickey et al., 2014[67]      | Africa           | Adult patients on antiretroviral drugs; N=373                                                                 | Hair                   | LC-MS/MS                 | nevirapine                                | Adherence                     |
| HIV/AIDS              | Rakhmanina et al., 2007[68]  | North America    | Paediatric patients with HIV-1 infection (aged 4 to 14 years) receiving nevirapine for at least 4 weeks; N=19 | Saliva*                | LC-MS/MS                 | nevirapine                                | TDM and Adherence             |
| HIV/AIDS              | Wintergerst et al., 2000[69] | Europe           | Asymptomatic HIV-infected male outpatients treated with antiretroviral containing indinavir; N=10             | Saliva*                | LC-MS                    | indinavir                                 | TDM and Adherence             |

| <b>Reported field</b> | <b>Study</b>                  | <b>Continent</b> | <b>Study population</b>                                                                                                                                       | <b>Matrix measured</b> | <b>Analytical method</b> | <b>Drugs evaluated</b>                      | <b>Clinical applicability</b> |
|-----------------------|-------------------------------|------------------|---------------------------------------------------------------------------------------------------------------------------------------------------------------|------------------------|--------------------------|---------------------------------------------|-------------------------------|
| HIV/AIDS              | van Heeswijk et al., 2001[70] | Europe           | HIV-1-infected patients treated with nevirapine 200mg twice daily for at least 4 weeks; N=43                                                                  | Saliva*                | HPLC                     | nevirapine                                  | TDM                           |
| HIV/AIDS              | Johnston et al., 2019[71]     | Africa           | HIV-positive outpatients; N=135                                                                                                                               | Hair*                  | LC-MS/MS                 | efavirenz                                   | TDM                           |
| HIV/AIDS              | Murnane et al., 2019[72]      | Africa           | HIV-positive women that started ART during pregnancy and continued postpartuum; N=71                                                                          | Hair                   | LC-MS/MS                 | tenofovir                                   | Adherence                     |
| HIV/AIDS              | Gandhi et al., 2019[73]       | Asia             | HIV-positive participants; N=75                                                                                                                               | Hair                   | LC-MS/MS                 | nevirapine, efavirenz                       | Adherence                     |
| HIV/AIDS              | Chu et al., 2018[74]          | Asia             | HIV-positive adults; N=54                                                                                                                                     | Hair                   | LC-MS/MS                 | zidovudine, efavirenz, lopinavir, ritonavir | Adherence                     |
| HIV/AIDS              | Tabb et al., 2018[75]         | Africa           | HIV positive youngsters (age: 11-24y); N=227                                                                                                                  | Hair                   | LC-MS/MS                 | efavirenz, nevirapine, lopinavir, ritonavir | Adherence                     |
| HIV/AIDS              | Hugen et al., 2000[76]        | Europe           | Adult outpatients infected with HIV who were treated chronically with indinavir 800mg q8h; N=14                                                               | Saliva*                | HPLC                     | indinavir                                   | TDM and Adherence             |
| HIV/AIDS              | Gandhi et al., 2017[77]       | North America    | HIV-negative men who have sex with men and transgender women using prep; N=280                                                                                | Hair                   | LC-MS/MS                 | tenofovir                                   | Adherence                     |
| HIV/AIDS              | Pintye et al., 2017[78]       | Asia             | HIV infected children on standard second-line ART; N=244                                                                                                      | Hair                   | LC-MS/MS                 | lopinavir                                   | TDM and Adherence             |
| HIV/AIDS              | Chawana et al., 2017[79]      | Africa           | HIV-infected adolescents failing second-line ART; N=50                                                                                                        | Hair                   | LC-MS/MS                 | atazanavir                                  | TDM and Adherence             |
| HIV/AIDS              | Koss et al., 2017[80]         | Africa           | Samples were collected from men and transgender women that were enrolled in 2 open-label prep studies and from uninfected women participating in a randomized | Hair*                  | LC-MS/MS                 | tenofovir                                   | Adherence                     |

| Reported field | Study                            | Continent     | Study population                                                                                                                                                                                     | Matrix measured | Analytical method | Drugs evaluated                  | Clinical applicability |
|----------------|----------------------------------|---------------|------------------------------------------------------------------------------------------------------------------------------------------------------------------------------------------------------|-----------------|-------------------|----------------------------------|------------------------|
| HIV/AIDS       | Koss et al., 2015[81]            | Africa        | double-blind phase iib trial; N=1165<br>HIV-infected pregnant women at 12-28 gestation enrolled in ART trial;                                                                                        | Hair            | LC-MS/MS          | lopinavir, efavirenz             | TDM                    |
| HIV/AIDS       | Yan et al., 2016[82]             | Asia          | N=325<br>HIV infected adults;                                                                                                                                                                        | Hair            | LC-MS/MS          | lamivudine                       | Adherence              |
| HIV/AIDS       | Prasitsuebsai et al., 2015[83]   | Asia          | N=287<br>Children with HIV infection on second-line ART regimens;                                                                                                                                    | Hair*           | LC-MS/MS          | lopinavir                        | Adherence              |
| HIV/AIDS       | Olds et al., 2015[84]            | Africa        | N=149<br>Children with HIV infection (2-10 years of age);                                                                                                                                            | Hair            | LC-MS/MS          | nevirapine                       | Adherence              |
| HIV/AIDS       | Baxi et al., 2015[85]            | North America | N=74<br>HIV infected women;                                                                                                                                                                          | Hair            | LC-MS/MS          | nevirapine                       | TDM                    |
| HIV/AIDS       | Baxi et al., 2015[86]            | Africa        | N=271<br>HIV-negative serodiscordant couples and men who have sex with men using daily or intermittent prep in two phase II prep trials;                                                             | Hair*           | LC-MS/MS          | tenofovir , emtricitabine        | TDM and Adherence      |
| HIV/AIDS       | Kromdijk et al., 2013[87]        | Europe        | N=88<br>HIV-infected adults;                                                                                                                                                                         | DBS*            | LC-MS/MS          | efavirenz, nevirapine            | TDM                    |
| HIV/AIDS       | George et al., 2014[88]          | Africa        | N=50<br>HIV-infected adults;                                                                                                                                                                         | Saliva          | TLC               | nevirapine                       | Adherence              |
| HIV/AIDS       | Lamorde et al., 2014[89]         | Africa        | N=101<br>HIV-infected adults;                                                                                                                                                                        | Saliva*         | TCL HPLC          | nevirapine                       | TDM                    |
| HIV/AIDS       | Duthaler et al., 2018[90]        | Europe        | N=297<br>HIV infected adults from Switzerland and Tanzania;                                                                                                                                          | DBS*            | LC-MS/MS          | nevirapine, efavirenz, lopinavir | TDM                    |
| HIV/AIDS       | Van Schooneveld et al., 2010[91] | North America | N=359<br>Adult HIV patients attending the HIV clinic, age >19 years, receipt of atazanavir (with or without ritonavir) for at least 7 days prior, and HIV RNA of <50 copies/ml for the last 90 days; | DBS*            | UPLC              | atazanavir                       | TDM                    |
| HIV/AIDS       | ter Heine et al.,                | Europe        | N=48<br>Outpatients aged 18 years and older                                                                                                                                                          | DBS*            | LC-MS/MS          | ritonavir, darunavir,            | TDM                    |

| Reported field | Study                        | Continent     | Study population                                                                                                                                                      | Matrix measured | Analytical method | Drugs evaluated               | Clinical applicability |
|----------------|------------------------------|---------------|-----------------------------------------------------------------------------------------------------------------------------------------------------------------------|-----------------|-------------------|-------------------------------|------------------------|
|                | 2011[92]                     |               | with confirmed HIV infection and used etravirine, darunavir/ritonavir or raltegravir for at least 2 weeks; N=11                                                       |                 |                   | raltegravir                   |                        |
| HIV/AIDS       | de Truchis et al., 2016[93]  | Africa        | HIV-1 infected adults aged 18 years or older and had been treated with ART for 1 year; N=218                                                                          | DBS             | LC-MS             | nevirapine, efavirenz         | Adherence              |
| HIV/AIDS       | Yang et al., 2020[94]        | Asia          | HIV-infected adults; N=75                                                                                                                                             | Hair            | LC-MS/MS          | nevirapine                    | Adherence              |
| HIV/AIDS       | Zhang et al., 2020[95]       | Asia          | HIV-infected adults; N=268                                                                                                                                            | Hair            | LC-MS/MS          | tenofovir                     | Adherence              |
| HIV/AIDS       | Ngara et al., 2020[96]       | Africa        | HIV-infected adults on second-line treatment; N=50                                                                                                                    | Hair*           | LC-MS/MS          | atazanavir, ritonavir         | TDM                    |
| HIV/AIDS       | de Lastours et al., 2011[97] | Europe        | Adult HIV-infected patients (<65 years old) receiving a stable antiretroviral regimen, including 245 mg TDF daily and/or 200 mg FTC daily for at least 3 months; N=41 | Saliva*         | LC-MS/MS          | tenofovir , emtricitabine     | TDM                    |
| HIV/AIDS       | Gandhi et al., 2012[98]      | North America | Women with or without HIV infection; N=111                                                                                                                            | Hair*           | LC-MS/MS          | efavirenz                     | TDM                    |
| IBD            | Alsous et al., 2020[99]      | Europe        | Paediatric patients on AZA/6-MP treatment; N=29                                                                                                                       | DBS*            | LC-MS/MS          | azathioprine, mercaptopurine  | TDM                    |
| IBD            | Detrez et al., 2019[100]     | Europe        | Patients initiating or under maintenance golimumab for moderate-to-severe ulcerative colitis; N=10                                                                    | DBS*            | ELISA             | golimumab                     | TDM                    |
| IBD            | Bian et al., 2020[101]       | Europe        | Vedolizumab-treated outpatients with ulcerative colitis or Chron's disease; N=19                                                                                      | DBS*            | ELISA             | vedolizumab                   | TDM                    |
| Pain           | Heiskanen et al., 2015[102]  | Europe        | Cancer patients on any dose of controlled-release (CR) oral                                                                                                           | Saliva*         | GC-MS             | morphine, fentanyl, oxycodone | TDM                    |

| Reported field       | Study                         | Continent         | Study population                                                                                                                                             | Matrix measured | Analytical method                                | Drugs evaluated                     | Clinical applicability |
|----------------------|-------------------------------|-------------------|--------------------------------------------------------------------------------------------------------------------------------------------------------------|-----------------|--------------------------------------------------|-------------------------------------|------------------------|
| Pain                 | Hardy et al., 2012[103]       | Australia/Oceania | morphine, CR oral oxycodone, or TD fentanyl;<br>N=64<br>Patients with cancer, using sustained release oxycodone (Oxycontin);<br>N=43                         | Saliva*         | LC-MS/MS                                         | oxycodone                           | TDM                    |
| Pain                 | Musshoff et al., 2007[104]    | Europe            | Adult patients with cancer pain;<br>N=31                                                                                                                     | Hair            | LC-MS/MS                                         | tramadol, morphine, fentanyl        | Adherence              |
| Pain                 | Idkaidek et al., 2018[105]    | Asia              | Patients with neuropathic pain;<br>N=44                                                                                                                      | Saliva*         | LC-MS/MS                                         | pregabalin                          | TDM                    |
| Pain                 | Miguez-Díez et al., 2015[106] | South America     | Outpatients taking methadone for pain management;<br>N=14                                                                                                    | Saliva*         | HPLC                                             | methadone                           | TDM                    |
| Pain                 | Shaparin et al., 2017[107]    | North America     | Male and female chronic pain patients aged 18-72 years undergoing opioid treatment at pain management clinics;<br>N=356                                      | Saliva*         | LC-MS/MS                                         | oxycodone                           | Adherence              |
| Parkinson            | Kronstrand et al., 2003[108]  | Europe            | Patients with Parkinson's disease;<br>N=16                                                                                                                   | Hair*           | GC MS spectrophotometry for melanin quantitation | selegiline                          | Adherence              |
| Psychiatric disorder | Sun et al., 2019[109]         | Asia              | Patients who were treated with risperidone for more than 3 months;<br>N=34                                                                                   | Hair*           | LC-MS/MS                                         | risperidone                         | TDM                    |
| Psychiatric disorder | Preiskorn et al., 2018[110]   | Europe            | Children and adults diagnosed with attention-deficit/hyperactivity disorders, aged 7 to 48 years, undergoing medical treatment with methylphenidate;<br>N=36 | Saliva*         | LC-MS/MS                                         | methylphenidate                     | TDM                    |
| Psychiatric disorder | Ebert et al., 2018[111]       | Europe            | Inpatients or outpatients, aged 19 - 79 years, undergoing treatment with venlafaxine, citalopram, or quetiapine;<br>N=75                                     | Saliva*         | LC-MS/MS HPLC-UV                                 | venlafaxine, quetiapine, citalopram | TDM                    |
| Psychiatric disorder | Neumann et al., 2018[112]     | Europe            | Adult patients hospitalized for psychiatric disorders;                                                                                                       | Saliva*         | UPLC-MS/MS                                       | aripiprazole, citalopram,           | Adherence              |

| Reported field       | Study                          | Continent     | Study population                                                                                                                                        | Matrix measured | Analytical method | Drugs evaluated                                                                            | Clinical applicability |
|----------------------|--------------------------------|---------------|---------------------------------------------------------------------------------------------------------------------------------------------------------|-----------------|-------------------|--------------------------------------------------------------------------------------------|------------------------|
|                      |                                |               | N=96                                                                                                                                                    |                 |                   | escitalopram,<br>duloxetine,<br>mirtazapine,<br>pipamperone,<br>venlafaxine,<br>quetiapine |                        |
| Psychiatric disorder | Kloosterboer et al., 2018[113] | Europe        | Patients aged 18 years or older who used either risperidone, paliperidone (the active metabolite of risperidone), aripiprazole, or pipamperone;<br>N=81 | DBS*            | LC-MS/MS          | risperidone,<br>paliperidone,<br>aripiprazole,<br>pipamperone                              | TDM and Adherence      |
| Psychiatric disorder | Geers et al., 2017[114]        | Europe        | Schizophrenia patients aged 18-55 years, treated with clozapine, on a stable dose for at least 2 weeks, and had Caucasian ethnicity;<br>N=15            | DBS*            | LC-MS/MS          | clozapine                                                                                  | TDM                    |
| Psychiatric disorder | da Silva et al., 2018[115]     | South America | Outpatients on fluoxetine treatment for > 6 months;<br>N=30                                                                                             | DBS*            | UHPLC-MS/MS       | fluoxetine                                                                                 | TDM                    |
| Psychiatric disorder | Böttcher et al., 2019[116]     | Europe        | ADHD patients on Elvanse therapy, of which the oral fluid samples were sent to the laboratory for analysis;<br>N=70                                     | Saliva          | UPLC-MS/MS        | lisdexamfetamine                                                                           | Adherence              |
| Psychiatric disorder | Sticht et al., 2007[117]       | Europe        | Children (7-16 years of age) with ADHD;<br>N=17                                                                                                         | Hair            | GC-MS             | methylphenidate                                                                            | Adherence              |
| Psychiatric disorder | Marchei et al., 2008[118]      | Europe        | Children diagnosed with ADHD;<br>N=11                                                                                                                   | Hair            | LC-MS             | methylphenidate                                                                            | Adherence              |
| Psychiatric disorder | Fucci et al., 2007[119]        | Europe        | Patients on stable methadone maintenance therapy;<br>N=10                                                                                               | Hair            | GC MS             | methadone                                                                                  | Adherence              |
| Psychiatric disorder | Cirimele et al., 2000[120]     | Europe        | Schizophrenic patients with refractory psychosis;<br>N=26                                                                                               | Hair*           | GC-MS             | clozapine                                                                                  | TDM                    |
| Psychiatric disorder | Pirro et al., 2014[121]        | Europe        | Patients treated for opiate addiction;<br>N=79                                                                                                          | Hair            | LC-MS/MS          | buprenorphine                                                                              | TDM                    |

| <b>Reported field</b> | <b>Study</b>                   | <b>Continent</b> | <b>Study population</b>                                                                                                                  | <b>Matrix measured</b> | <b>Analytical method</b> | <b>Drugs evaluated</b>                 | <b>Clinical applicability</b> |
|-----------------------|--------------------------------|------------------|------------------------------------------------------------------------------------------------------------------------------------------|------------------------|--------------------------|----------------------------------------|-------------------------------|
| Psychiatric disorder  | Skopp et al., 2011[122]        | Europe           | Participants in a maintenance program; N=18                                                                                              | Hair                   | LC-MS/MS                 | buprenorphine                          | TDM                           |
| Psychiatric disorder  | Weber et al., 2017[123]        | Europe           | Depressive patients over 20 years old receiving citalopram or mirtazapine; N=36                                                          | DBS*                   | LC-MS                    | citalopram, mirtazapine                | TDM                           |
| Psychiatric disorder  | Dziurkowska et al., 2013[124]  | Europe           | Women with major depressive disorder treated with venlafaxine; N=14                                                                      | Saliva                 | HPLC                     | venlafaxine                            | TDM                           |
| Psychiatric disorder  | Mercolini et al., 2014[125]    | Europe           | Schizophrenic patients treated with ziprasidone at the mental health centres; N=10                                                       | DBS*                   | HPLC-F                   | ziprasidone                            | TDM                           |
| Psychiatric disorder  | Wang et al., 2019[126]         | Asia             | Schizophrenic patients with fixed drug use for >6 months; N=46                                                                           | Hair                   | LC-MS/MS                 | clozapine, chlorpromazine, risperidone | TDM                           |
| Psychiatric disorder  | Pappadopulos et al., 2009[127] | North America    | Children (7-10 years of age) with ADHD; N=289                                                                                            | Saliva                 | GC                       | methylphenidate                        | Adherence                     |
| Psychiatric disorder  | Fisher et al., 2017[128]       | Europe           | Psychiatric inpatients and outpatients; N=112                                                                                            | Saliva*                | LC-MS/MS                 | clozapine, amisulpride                 | TDM and Adherence             |
| Psychiatric disorder  | Flarakos et al., 2004[129]     | North America    | Pediatrics on risperidone attending the outpatient clinic and adults admitted to a clinical unit and receiving regular risperidone; N=13 | Saliva*                | LC-MS/MS                 | risperidone                            | TDM and Adherence             |
| Psychiatric disorder  | Shiran et al., 2005[130]       | Europe           | Adult patients attending clinic at the Substance Misuse Service of Community Health and receiving methadone maintenance treatment; N=60  | Saliva*                | LC-MS                    | methadone                              | TDM                           |
| Psychiatric disorder  | Saracino et al., 2012[131]     | Europe           | Former heroin-addicted patients undergoing methadone maintenance treatment; N=16                                                         | DBS*                   | HPLC                     | methadone                              | TDM                           |
| Psychiatric disorder  | Fisher et al.,                 | Africa           | Inpatients and outpatients, adults,                                                                                                      | Saliva*                | LC-MS/MS                 | clozapine,                             | TDM                           |

| <b>Reported field</b>        | <b>Study</b>                        | <b>Continent</b> | <b>Study population</b>                                                                                                                                                | <b>Matrix measured</b> | <b>Analytical method</b>                                | <b>Drugs evaluated</b>                                                                  | <b>Clinical applicability</b> |
|------------------------------|-------------------------------------|------------------|------------------------------------------------------------------------------------------------------------------------------------------------------------------------|------------------------|---------------------------------------------------------|-----------------------------------------------------------------------------------------|-------------------------------|
| disorder                     | 2013[132]                           |                  | receiving antipsychotics treatment; N=90                                                                                                                               |                        |                                                         | risperidone, quetiapine                                                                 |                               |
| Psychiatric disorder         | Stegmann et al., 2016[133]          | Europe           | Pediatric and adult patients (= 60 years) with attention-deficit hyperactivity disorder or hyperkinetic disorder receiving methylphenidate (daily doses 5-80 mg); N=12 | Saliva*                | HPLC                                                    | methylphenidate                                                                         | TDM and Adherence             |
| Psychiatric disorder         | Patteet et al., 2016[134]           | Europe           | Psychiatric patients (19-65 years) diagnosed with schizophrenia, schizoaffective or bipolar disorder, taking antipsychotics treatment; N=85                            | Saliva*                | UHPLC-MS/MS                                             | amisulpride, aripiprazole, clozapine, olanzapine, paliperidone, quetiapine, risperidone | TDM and Adherence             |
| Psychiatric disorder         | Ramírez Fernández et al., 2020[135] | North America    | Patients in criminal justice system prescribed with chlorpromazine, haloperidol, olanzapine, quetiapine, or risperidone.; N=59                                         | Hair                   | UPLC-MS/MS                                              | olanzapine, risperidone, haloperidol                                                    | Adherence                     |
| Psychiatric disorder         | Ransohoff et al., 2019[136]         | North America    | Patients at the addiction-psychiatry clinics undergoing buprenorphine treatment; N=260                                                                                 | Saliva and Urine       | LC-MS/MS                                                | buprenorphine                                                                           | Adherence                     |
| Psychiatric disorder         | Wohkittel et al., 2020[137]         | Europe           | Children and Adolescents with ADHD (age: 7-16 years); N=28                                                                                                             | Saliva*                | HPLC with fluorescence detector                         | lisdexamfetamine                                                                        | TDM                           |
| Psychiatric disorder         | Manfro et al., 2020[138]            | South America    | Patients over 18 years receiving lithium carbonate therapy for at least one week; N=43                                                                                 | DBS*                   | Graphite furnace atomic absorption spectrometry (GFAAS) | lithium                                                                                 | TDM                           |
| Q fever or Whipple's disease | Angelakis et al., 2015[139]         | Europe           | Outpatients treated with doxycycline and hydroxychloroquine for Q fever or Whipple's disease; N=14                                                                     | Hair*                  | UPLC                                                    | doxycycline                                                                             | Adherence                     |
| Systemic                     | Hawwa et al.,                       | Europe           | Children diagnosed with juvenile                                                                                                                                       | DBS*                   | LC-MS/MS (DBS)                                          | methotrexate                                                                            | TDM and                       |



| <b>Reported field</b>         | <b>Study</b>                | <b>Continent</b>  | <b>Study population</b>                                                                                                                                                                                                                                                                                                                            | <b>Matrix measured</b> | <b>Analytical method</b>         | <b>Drugs evaluated</b> | <b>Clinical applicability</b> |
|-------------------------------|-----------------------------|-------------------|----------------------------------------------------------------------------------------------------------------------------------------------------------------------------------------------------------------------------------------------------------------------------------------------------------------------------------------------------|------------------------|----------------------------------|------------------------|-------------------------------|
| inflammatory disease          | 2014[140]                   |                   | idiopathic arthritis (JIA) and juvenile dermatomyositis (JDM) receiving methotrexate weekly doses (oral or subcutaneous, 10-20 mg) for at least two months; N=47                                                                                                                                                                                   |                        | HPLC (packed RBC)                |                        | Adherence                     |
| Systemic inflammatory disease | Kneepkens et al., 2017[141] | Europe            | Patients with rheumatoid arthritis (RA), psoriatic arthritis (psa) and ankylosing spondylitis (AS) treated with adalimumab once every two weeks, with or without synthetic disease-modifying antirheumatic drugs (dmards), non-steroidal anti-inflammatory drugs (nsaids) and/or prednisone; N=161                                                 | DBS*                   | ELISA antigen-binding test (ABT) | adalimumab             | TDM                           |
| Transplantation               | Brooks et al., 2019[142]    | Australia/Oceania | Adult (18 years of age or over) renal transplant recipients, had undergone kidney transplant surgery 4-8 weeks prior, receiving triple immunosuppressive therapy consisting of oral enteric-coated mycophenolate sodium (EC-MS) twice daily, tacrolimus twice daily and prednisolone daily; N=20                                                   | Saliva*                | UPLC-MS                          | prednisolone           | TDM                           |
| Transplantation               | Brooks et al., 2019[143]    | Australia/Oceania | Adult (18 years of age or over) renal transplant recipients, had undergone kidney transplant surgery 4-8 weeks prior, receiving triple immunosuppressive therapy consisting of oral enteric-coated mycophenolate sodium (EC-MS) (540-720 mg twice daily), tacrolimus (twice daily, total daily dose 3-22 mg) and prednisolone 14-21 mg daily; N=20 | Saliva*                | UPLC-MS                          | mycophenolic acid      | TDM                           |

| <b>Reported field</b> | <b>Study</b>                  | <b>Continent</b> | <b>Study population</b>                                                                                                                                                                                                                           | <b>Matrix measured</b> | <b>Analytical method</b>     | <b>Drugs evaluated</b>        | <b>Clinical applicability</b> |
|-----------------------|-------------------------------|------------------|---------------------------------------------------------------------------------------------------------------------------------------------------------------------------------------------------------------------------------------------------|------------------------|------------------------------|-------------------------------|-------------------------------|
| Transplantation       | Ferreira et al., 2019[144]    | South America    | Adult kidney transplant patients, hospitalized, received a dose of 750 mg of MMF twice a day; N=13                                                                                                                                                | Saliva*                | LC-MS/MS                     | mycophenolic acid             | TDM                           |
| Transplantation       | Ghareeb et al., 2018[145]     | North America    | Stable kidney transplant recipients that were on a maintenance immunosuppressive tacrolimus, mycophenolic acid, and prednisone; N=46                                                                                                              | Saliva*                | LC-MS/MS                     | tacrolimus                    | TDM                           |
| Transplantation       | Martial et al., 2017[146]     | Europe           | Patients between 2 and 18 years of age after kidney transplantation, treated with at least 1 of the compounds of interest (tacrolimus or mycophenolic acid), admitted to the pediatric ward or visit their physician on an outpatient basis; N=28 | DBS*                   | LC-MS/MS                     | tacrolimus, mycophenolic acid | TDM                           |
| Transplantation       | Al-Uzri et al., 2017[147]     | North America    | Youth patients at least 3 months post-transplant, undergoing TAC immunosuppression therapy, and English speaking recruited from a pediatric renal transplantation clinic; N=30                                                                    | DBS*                   | LC-MS/MS<br>Radioimmunoassay | tacrolimus                    | TDM                           |
| Transplantation       | Müller et al., 2013[148]      | Europe           | Liver transplant patients; N=15                                                                                                                                                                                                                   | Hair*                  | LC-MS/MS                     | ciclosporin                   | TDM and Adherence             |
| Transplantation       | Hoogtanders et al., 2007[149] | Europe           | Adult kidney transplant outpatients receiving tacrolimus; N=24                                                                                                                                                                                    | DBS*                   | LC-MS/MS                     | tacrolimus                    | TDM                           |
| Transplantation       | Wilhelm et al., 2013[150]     | Europe           | Adult patients (18 years or older) who were treated orally with ciclosporin after allogeneic hematopoietic stem cell transplantation; N=36                                                                                                        | DBS*                   | LC-MS/MS                     | ciclosporin                   | TDM                           |
| Transplantation       | Arpini et al., 2013[151]      | South America    | Adult patients (18 years or older) treated orally with mycophenolate mofetil or mycophenolate sodium                                                                                                                                              | DBS*                   | UHPLC                        | mycophenolic acid             | TDM                           |

| Reported field  | Study                         | Continent     | Study population                                                                                                                                                                                       | Matrix measured | Analytical method | Drugs evaluated               | Clinical applicability |
|-----------------|-------------------------------|---------------|--------------------------------------------------------------------------------------------------------------------------------------------------------------------------------------------------------|-----------------|-------------------|-------------------------------|------------------------|
| Transplantation | Veenhof et al., 2017[152]     | Europe        | after kidney transplantation; N=19<br>Adult kidney transplant patients received tacrolimus or cyclosporine A, mycophenolate mofetil, and prednisolone;                                                 | DBS*            | LC-MS/MS          | tacrolimus, ciclosporin       | TDM                    |
| Transplantation | Hinchliffe et al., 2013[153]  | Europe        | N=172<br>Heart and lung transplant patients during outpatient consultations in a specialist cardiothoracic transplant centre over a period of six months receiving either ciclosporin A or tacrolimus; | DBS*            | UPLC-MS/MS        | ciclosporin, tacrolimus       | TDM                    |
| Transplantation | Koster et al., 2017[154]      | Europe        | N=91<br>Transplant patients;                                                                                                                                                                           | DBS*            | LC-MS/MS          | tacrolimus, ciclosporin       | TDM                    |
| Transplantation | Mendonza et al., 2006[155]    | North America | N=142<br>Male, Caucasian, kidney transplant recipients attending transplant services clinic, on immunosuppressive therapy with tacrolimus and prednisone;                                              | Saliva*         | LC-MS/MS          | mycophenolic acid             | TDM                    |
| Transplantation | Veenhof et al., 2019[156]     | Europe        | N=11<br>Adult transplant patients;                                                                                                                                                                     | DBS*            | LC-MS/MS          | sirolimus, everolimus         | TDM                    |
| Transplantation | Dickerson et al., 2014[157]   | North America | N=56<br>Pediatric (1 year or older) kidney, heart and liver recipients.;                                                                                                                               | DBS*            | LC-MS/MS          | tacrolimus, sirolimus         | TDM                    |
| Transplantation | Zwart et al., 2018[158]       | Europe        | N=34<br>Kidney(-pancreas) transplant recipients;                                                                                                                                                       | DBS*            | LC-MS/MS          | tacrolimus, mycophenolic acid | TDM                    |
| Transplantation | Hoogtanders et al., 2007[159] | Europe        | N=65<br>Stable outpatients with kidney transplant;                                                                                                                                                     | DBS*            | LC-MS/MS          | tacrolimus                    | TDM                    |
| Transplantation | Mendonza et al., 2004[160]    | North America | N=26<br>Kidney transplant recipients attending the outpatient clinic at the hospital and taking cyclosporine (csa);                                                                                    | Saliva*         | LC-MS/MS          | ciclosporin                   | TDM                    |
|                 |                               |               | N=15                                                                                                                                                                                                   |                 |                   |                               |                        |

| <b>Reported field</b> | <b>Study</b>                 | <b>Continent</b> | <b>Study population</b>                                                                                                                                                        | <b>Matrix measured</b> | <b>Analytical method</b> | <b>Drugs evaluated</b>                                                                                            | <b>Clinical applicability</b> |
|-----------------------|------------------------------|------------------|--------------------------------------------------------------------------------------------------------------------------------------------------------------------------------|------------------------|--------------------------|-------------------------------------------------------------------------------------------------------------------|-------------------------------|
| Transplantation       | van Boekel et al., 2015[161] | Europe           | Renal transplant patients; N=26                                                                                                                                                | DBS                    | LC-MS/MS                 | tacrolimus                                                                                                        | TDM                           |
| Transplantation       | Cheung et al., 2008[162]     | Asia             | Renal transplant recipients; N=36                                                                                                                                              | DBS*                   | LC-MS/MS                 | tacrolimus                                                                                                        | TDM                           |
| Transplantation       | Koop et al., 2013[163]       | North America    | Pediatric kidney transplant recipients (age 6-20 years); N=21                                                                                                                  | DBS*                   | LC-MS/MS                 | tacrolimus                                                                                                        | TDM                           |
| Transplantation       | Alsmadi et al., 2019[164]    | Asia             | Jordanian pediatric kidney transplant recipients (4-18 years); N=26                                                                                                            | Saliva*                | LC-MS/MS                 | mycophenolic acid                                                                                                 | TDM                           |
| Transplantation       | Veenhof et al., 2020[165]    | Europe           | Adult kidney transplant recipients; N=107                                                                                                                                      | DBS*                   | LC-MS/MS                 | tacrolimus                                                                                                        | TDM                           |
| Tuberculosis          | Martial et al., 2018[166]    | South America    | Hospitalized or ambulatory children, aged 1 - 15 years, with pulmonary or extrapulmonary TB, started treatment with a fixed-dose combination of first-line anti-TB drugs; N=11 | DBS*                   | LC-MS/MS                 | rifampicin, pyrazinamide                                                                                          | TDM                           |
| Tuberculosis          | Vu et al., 2014[167]         | Europe           | Adult tuberculosis patients received rifampicin or clarithromycin; N=13                                                                                                        | DBS*                   | LC-MS/MS                 | rifampicin                                                                                                        | TDM                           |
| Tuberculosis          | Metcalfe et al., 2019[168]   | North America    | Patients, most undergoing MDR- or XDR-TB therapy; N=47                                                                                                                         | Hair                   | LC-MS/MS                 | isoniazid, pyrazinamide, ethambutol, levofloxacin, moxifloxacin, bedaquiline, clofazimine, linezolid, ethionamide | TDM                           |
| Tuberculosis          | Mave et al., 2017[169]       | Asia             | Children (<12 years) with tuberculosis; N=16                                                                                                                                   | Hair*                  | LC-MS/MS                 | isoniazid                                                                                                         | TDM                           |
| Tuberculosis          | Mave et al., 2016[170]       | Asia             | Children <12 years newly diagnosed with tuberculosis; N=38                                                                                                                     | Hair                   | LC-MS/MS                 | isoniazid                                                                                                         | TDM                           |

| <b>Reported field</b> | <b>Study</b>                    | <b>Continent</b> | <b>Study population</b>                                                                                                                                                     | <b>Matrix measured</b> | <b>Analytical method</b> | <b>Drugs evaluated</b> | <b>Clinical applicability</b> |
|-----------------------|---------------------------------|------------------|-----------------------------------------------------------------------------------------------------------------------------------------------------------------------------|------------------------|--------------------------|------------------------|-------------------------------|
| Tuberculosis          | Gerona et al., 2016[171]        | North America    | Patients with active or latent TB infection;<br>N=18                                                                                                                        | Hair                   | LC-MS/MS                 | isoniazid              | Adherence                     |
| Tuberculosis          | Ghimire et al., 2019[172]       | Asia             | Patients (=18 years) with newly diagnosed or previously treated MDR-TB receiving levofloxacin as a part of their MDR-TB regimen;<br>N=23                                    | Saliva*                | LC-MS/MS                 | levofloxacin           | TDM                           |
| Tuberculosis          | van den Elsen et al., 2020[173] | Europe           | Hospitalized adult TB patients in the Tuberculosis center received moxifloxacin or linezolid as part of their TB treatment and had routine TDM using blood samples;<br>N=22 | Saliva*                | LC-MS/MS                 | moxifloxacin           | TDM                           |
| Tuberculosis          | van den Elsen et al., 2020[174] | Europe           | Adult TB patients admitted at the Tuberculosis Center treated with rifampicin and/or isoniazid and had routine TDM for rifampicin or isoniazid;<br>N=19                     | Saliva*                | LC-MS/MS                 | rifampicin             | TDM                           |
| Tuberculosis          | Eisenhut et al., 2012[175]      | Europe           | Adult and paediatric patients (age 1-29 years) with latent or active TB infection;<br>N=40                                                                                  | Hair                   | LC-MS                    | isoniazid              | Adherence                     |

\* The drugs measurements were also performed in a classical matrix (blood/plasma/serum)

## References

1. Salamzadeh J, Dadashzadeh S, Habibi M, Estifaie S. Serum and saliva theophylline levels in adult outpatients with asthma and chronic obstructive pulmonary disease (COPD): A cross-sectional study. *Iran J Pharm Res.* 2008;7(1):83–7.
2. Hassall D, Brealey N, Wright W, Hughes S, West A, Ravindranath R, et al. Hair analysis to monitor adherence to prescribed chronic inhaler drug therapy in patients with asthma or COPD. *Pulm Pharmacol Ther.* 2018;51:59–64.
3. Peeters LEJ, Feyz L, Hameli E, Zwart T, Bahmany S, Daemen J, et al. Clinical validation of a dried blood spot assay for 8 antihypertensive drugs and 4 active metabolites. *Ther Drug Monit.* 2019;42(3):460–7.
4. Foerster KI, Huppertz A, Meid AD, Müller OJ, Rizos T, Tilemann L, et al. Dried-blood-spot technique to monitor direct oral anticoagulants: Clinical validation of a UPLC-MS/MS-based assay. *Anal Chem.* 2018;90(15):9395–402.
5. Zalstein E, Zucker N, Lifshitz M. Digoxin concentration in saliva and plasma in infants, children, and adolescents with heart disease. *Curr Ther Res Exp.* 2003;64(9):743–9.
6. Enderle Y, Meid AD, Friedrich J, Grünig E, Wilkens H, Haefeli WE, et al. Dried blood spot technique for the monitoring of ambrisentan, bosentan, sildenafil, and tadalafil in patients with pulmonary arterial hypertension. *Anal Chem.* 2015;87(24):12112–20.
7. Ghimenti S, Lomonaco T, Onor M, Murgia L, Paolicchi A, Fuoco R, et al. Measurement of warfarin in the oral fluid of patients undergoing anticoagulant oral therapy. *PLoS One.* 2011;6(12):e28182.
8. Lomonaco T, Ghimenti S, Piga I, Biagini D, Onor M, Fuoco R, et al. Influence of sampling on the determination of warfarin and warfarin alcohols in oral fluid. *PLoS One.* 2014;9(12):e114430.
9. Richter LHJ, Jacobs CM, Mahfoud F, Kindermann I, Böhm M, Meyer MR. Development and application of a LC-HRMS/MS method for analyzing antihypertensive drugs in oral fluid for monitoring drug adherence. *Anal Chim Acta.* 2019;1070:69–79.
10. Henkin RI. Comparative monitoring of oral theophylline treatment in blood serum, saliva, and nasal mucus. *Ther Drug Monit.* 2012;34(2):217–21.
11. Ferrari A, Baraldi C, Licata M, Vandelli D, Marchesi F, Palazzoli F, et al. Hair analysis for detection of triptans occasionally used or overused by migraine patients—a pilot study. *Eur J Clin Pharmacol.* 2016;72(9):1075–81.
12. Ferrari A, Licata M, Rustichelli C, Baraldi C, Vandelli D, Marchesi F, et al. Monitoring of adherence to headache treatments by means of hair analysis. *Eur J Clin Pharmacol.* 2017;73(2):197–203.
13. Scherf-Clavel M, Albert E, Zieher S, Valotis A, Hickethier T, Högger P. Dried blood spot testing for estimation of renal function and analysis of metformin and sitagliptin concentrations in diabetic patients: a cross-sectional study. *Eur J Clin Pharmacol.* 2019;75(6):809–16.
14. Guo M-Z, Shao L, Xi C, Li H-J, Wang L, Pan Y-J, et al. Assay of dried blood spot from finger prick for sodium valproate via ink auxiliary headspace gas chromatography mass spectrometry. *J Chromatogr A.* 2019;1601:335–9.
15. Brandt C, Bien CG, Helmer R, May TW. Assessment of the correlations of lacosamide

- concentrations in saliva and serum in patients with epilepsy. *Epilepsia*. 2018;59(4):e34–9.
16. Maldonado C, Fagiolino P, Vázquez M, Rey A, Olano I, Eiraldi R, et al. Therapeutic carbamazepine (CBZ) and valproic acid (VPA) monitoring in children using saliva as a biologic fluid. *J Epilepsy Clin Neurophysiol*. 2008;14(2):55–8.
  17. Tsatsakis AM, Psillakis T, Paritsis N. Phenytoin concentration in head hair sections: A method to evaluate the history of drug use. *J Clin Psychopharmacol*. 2000;20(5):560–73.
  18. Williams J, Myson V, Steward S, Jones G, Wilson JF, Kerr MP, et al. Self-discontinuation of antiepileptic medication in pregnancy: Detection by hair analysis. *Epilepsia*. 2002;43(8):824–31.
  19. Karas-Ruszczak K, Kuczyńska J, Sienkiewicz-Jarosz H, Kurkowska-Jastrzebska I, Bienkowski P, Restel M, et al. Comparison of plasma, saliva, and hair levetiracetam concentrations. *Ther Drug Monit*. 2017;39(3):263–8.
  20. Williams J, Patsalos PN, Mei Z, Schapel G, Wilson JF, Richens A. Relation between dosage of carbamazepine and concentration in hair and plasma samples from a compliant inpatient epileptic population. *Ther Drug Monit*. 2001;23(1):15–20.
  21. Rhoden L, Antunes MV, Hidalgo P, Silva CÁ da, Linden R. Simple procedure for determination of valproic acid in dried blood spots by gas chromatography-mass spectrometry. *J Pharm Biomed Anal*. 2014;96:207–12.
  22. Mecarelli O, Voti PL, Pro S, Romolo FS, Rotolo M, Pulitano P, et al. Saliva and serum levetiracetam concentrations in patients with epilepsy. *Ther Drug Monit*. 2007;29(3):313–8.
  23. Grim SA, Ryan M, Miles M V, Tang PH, Strawsburg RH, DeGrauw TJ, et al. Correlation of levetiracetam concentrations between serum and saliva. *Ther Drug Monit*. 2003;25(1):61–6.
  24. Linder C, Wide K, Walander M, Beck O, Gustafsson LL, Pohanka A. Comparison between dried blood spot and plasma sampling for therapeutic drug monitoring of antiepileptic drugs in children with epilepsy: A step towards home sampling. *Clin Biochem*. 2017;50(7–8):418–24.
  25. Dwivedi R, Gupta YK, Singh M, Joshi R, Tiwari P, Kaleekal T, et al. Correlation of saliva and serum free valproic acid concentrations in persons with epilepsy. *Seizure*. 2015;25:187–90.
  26. Greenaway C, Ratnaraj N, Sander JW, Patsalos PN. Saliva and serum lacosamide concentrations in patients with epilepsy. *Epilepsia*. 2011;52(2):258–63.
  27. Kaewdoug P, Chinvarun Y, Puripokai C, Tantisira MH, Laanwprasert S. Relationship between carbamazepine concentrations in serum and saliva of Thai epileptic patients. *Thai J Pharm Sci*. 2015;39(1):21–7.
  28. Tsiropoulos I, Kristensen O, Klitgaard NA. Saliva and serum concentration of lamotrigine in patients with epilepsy. *Ther Drug Monit*. 2000;22(5):517–21.
  29. Kuczynska J, Karas-Ruszczak K, Zakrzewska A, Dermanowski M, Sienkiewicz-Jarosz H, Kurkowska-Jastrzebska I, et al. Comparison of plasma, saliva, and hair lamotrigine concentrations. *Clin Biochem*. 2019;74:24–30.
  30. Shah NM, Hawwa AF, Millership JS, Collier PS, Ho P, Tan ML, et al. Adherence to antiepileptic medicines in children: A multiple-methods assessment involving dried blood spot sampling. *Epilepsia*. 2013;54(6):1020–7.
  31. Li RR, Sheng XY, Ma LY, Yao HX, Cai LX, Chen CY, et al. Saliva and plasma monohydroxycarbamazepine concentrations in pediatric patients with epilepsy. *Ther Drug Monit*.

- 2016;38(3):365–70.
32. Miles M V, Tang PH, Glauser TA, Ryan MA, Grim SA, Strawsburg RH, et al. Topiramate concentration in saliva: An alternative to serum monitoring. *Pediatr Neurol.* 2003;29(2):143–7.
  33. Dordević S, Kilibarda V, Stojanović T. Determination of carbamazepine in serum and saliva samples by high performance liquid chromatography with ultraviolet detection. *Vojnosanit Pregl.* 2009;66(5):347–52.
  34. Ryan M, Grim SA, Miles M V, Tang PH, Fakhoury TA, Strawsburg RH, et al. Correlation of lamotrigine concentrations between serum and saliva. *Pharmacotherapy.* 2003;23(12 I):1550–7.
  35. Linder C, Neideman M, Wide K, von Euler M, Gustafsson LL, Pohanka A. Dried blood spot self-sampling by guardians of children with epilepsy is feasible: comparison with plasma for multiple antiepileptic drugs. *Ther Drug Monit.* 2019;41(4):509–18.
  36. Kongrit J, Chinvarun Y, Niwattisaiwong N, Lawanprasert S. Verification of using saliva as an alternative to serum for topiramate monitoring. *Thai J Pharm Sci.* 2014;38(2):61–6.
  37. Dwivedi R, Singh M, Kaleekal T, Gupta YK, Tripathi M. Concentration of antiepileptic drugs in persons with epilepsy: a comparative study in serum and saliva. *Int J Neurosci.* 2016;126(11):972–8.
  38. Hamdan II, Alsous M, Masri AT. Chromatographic characterization and method development for determination of levetiracetam in saliva: application to correlation with plasma levels. *J Anal Methods Chem.* 2017;2017:7846742.
  39. Kim DY, Moon J, Shin YW, Lee ST, Jung KH, Park KI, et al. Usefulness of saliva for perampanel therapeutic drug monitoring. *Epilepsia.* 2020;61(6):1120–8.
  40. Franco V, Gatti, Mazzucchelli I, Marchiselli R, Fattore C, Rota P, et al. Relationship between saliva and plasma rufinamide concentrations in patients with epilepsy. *Epilepsia.* 2020;61(7):e79–84.
  41. Willemsen AECAB, Knapen LM, de Beer YM, Bruggemann RJM, Croes S, van Herpen CML, et al. Clinical validation study of dried blood spot for determining everolimus concentration in patients with cancer. *Eur J Clin Pharmacol.* 2018;74(4):465–71.
  42. Braal CL, Veerman GDM, Peric R, Aerts JGJV, Mathijssen RHJ, Koolen SLW, et al. Quantification of the tyrosine kinase inhibitor erlotinib in human scalp hair by liquid chromatography-tandem mass spectrometry: Pitfalls for clinical application. *J Pharm Biomed Anal.* 2019;172:175–82.
  43. Antunes MV, Raymundo S, De Oliveira V, Staudt DE, Gössling G, Peteffi GP, et al. Ultra-high performance liquid chromatography tandem mass spectrometric method for the determination of tamoxifen, N-desmethyltamoxifen, 4-hydroxytamoxifen and endoxifen in dried blood spots - Development, validation and clinical application during breast. *Talanta.* 2015;132:775–84.
  44. Maring JG, Wachters FM, Maurer M, Uges DRA, de Vries EGE, Groen HJM. Gemcitabine and epirubicin plasma concentration-related excretion in saliva in patients with non-small cell lung cancer. *Ther Drug Monit.* 2010;32(3):364–8.
  45. Boucaud M, Pinguet F, Culine S, Poujol S, Astre C, Gomeni R, et al. Modeling plasma and saliva topotecan concentration time course using a population approach. *Oncol Res.* 2003;13(4):211–9.
  46. Boons CCLM, Chahbouni A, Schimmel AM, Wilhelm AJ, den Hartog YM, Janssen JJWM, et al.



- Dried blood spot sampling of nilotinib in patients with chronic myeloid leukaemia: a comparison with venous blood sampling. *J Pharm Pharmacol.* 2017;69(10):1265–74.
47. de Wit D, den Hartigh J, Gelderblom H, Qian Y, den Hollander M, Verheul H, et al. Dried blood spot analysis for therapeutic drug monitoring of pazopanib. *J Clin Pharmacol.* 2015;55(12):1344–50.
  48. Capron A, Antunes MV, Wagner SC, Mattevi VS, Vieira N, Leite R, et al. First report of imatinib measurement in hair: Method development and preliminary evaluation of the relation between hair and plasma concentrations with therapeutic response in chronic myeloid leukemia. *Clin Chim Acta.* 2016;453:42–7.
  49. Andriguetti NB, Hahn RZ, Lizot LF, Raymundo S, Costa JL, da Cunha KF, et al. Analytical and clinical validation of a dried blood spot assay for the determination of paclitaxel using high-performance liquid chromatography-tandem mass spectrometry. *Clin Biochem.* 2018;54:123–30.
  50. Raymundo S, Muller V V, Andriguetti NB, Tegner M, Artmann AC, Kluck HM, et al. Determination of docetaxel in dried blood spots by LC–MS/MS: Method development, validation and clinical application. *J Pharm Biomed Anal.* 2018;157:84–91.
  51. Jager NGL, Rosing H, Schellens JHM, Beijnen JH, Linn SC. Use of dried blood spots for the determination of serum concentrations of tamoxifen and endoxifen. *Breast Cancer Res Treat.* 2014;146(1):137–44.
  52. Lee J, Jung SY, Choi M-Y, Park J-S, Park S-K, Lim S-A, et al. Development of a dried blood spot sampling method towards therapeutic monitoring of radotinib in the treatment of chronic myeloid leukaemia. *J Clin Pharm Ther.* 2020;45(5):1006–13.
  53. Dillenburg Weiss TL, Gössling G, Venzon Antunes M, Schwartzmann G, Linden R, Gasparin Verza S. Evaluation of dried blood spots as an alternative matrix for therapeutic drug monitoring of abiraterone and delta(4)-abiraterone in prostate cancer patients. *J Pharm Biomed Anal.* 2020;Epub ahead of print.
  54. Antunes M, Raymundo S, Wagner S, Mattevi VS, Vieira N, Leite R, et al. DBS sampling in imatinib therapeutic drug monitoring: from method development to clinical application. *Bioanalysis.* 2015;7(16):2105–17.
  55. Courlet P, Decosterd LA, Brown JA, Saldanha SA, Marzolini C, Cavassini M, et al. Emtricitabine and lamivudine concentrations in saliva: a simple suitable test for treatment adherence. *J Antimicrob Chemother.* 2019;74(8):2468–70.
  56. Wu Y, Yang J, Duan C, Chu L, Chen S, Qiao S, et al. Simultaneous determination of antiretroviral drugs in human hair with liquid chromatography-electrospray ionization-tandem mass spectrometry. *J Chromatogr B Anal Technol Biomed Life Sci.* 2018;1083:209–21.
  57. Kromdijk W, Mulder JW, Rosing H, Smit PM, Beijnen JH, Huitema ADRR. Use of dried blood spots for the determination of plasma concentrations of nevirapine and efavirenz. *J Antimicrob Chemother.* 2012;67(5):1211–6.
  58. Alcaide ML, Ramlagan S, Rodriguez VJ, Cook R, Peltzer K, Weiss SM, et al. Self-report and dry blood spot measurement of antiretroviral medications as markers of adherence in pregnant women in rural South Africa. *AIDS Behav.* 2017;21(7):2135–40.
  59. van Zyl GU, van Mens TE, McIlleron H, Zeier M, Nachege JB, Decloedt E, et al. Low lopinavir plasma or hair concentrations explain second-line protease inhibitor failures in a resource-limited

- setting. *J Acquir Immune Defic Syndr.* 2011;56(4):333–9.
60. Gandhi M, Glidden D V, Liu A, Anderson PL, Horng H, Defechereux P, et al. Strong correlation between concentrations of tenofovir (TFV) emtricitabine (FTC) in hair and TFV diphosphate and FTC triphosphate in dried blood spots in the iPrEx open label extension: Implications for pre-exposure prophylaxis adherence monitoring. *J Infect Dis.* 2015;212(9):1402–6.
  61. Yamada E, Takagi R, Tanabe Y, Fujiwara H, Hasegawa N, Kato S. Plasma and saliva concentrations of abacavir, tenofovir, darunavir, and raltegravir in HIV-1-infected patients. *Int J Clin Pharmacol Ther.* 2017;55(7):567–70.
  62. Bernard L, Vuagnat A, Peytavin G, Hallouin M-C, Bouhour D, Nguyen TH, et al. Relationship between levels of indinavir in hair and virologic response to highly active antiretroviral therapy. *Ann Intern Med.* 2002;137(8):656–9.
  63. Duval X, Peytavin G, Breton G, Ecobichon J-L, Descamps D, Thabut G, et al. Hair versus plasma concentrations as indicator of indinavir exposure in HIV-1-infected patients treated with indinavir/ritonavir combination. *AIDS.* 2007;21(1):106–8.
  64. Gandhi M, Ameli N, Bacchetti P, Gange SJ, Anastos K, Levine A, et al. Protease inhibitor levels in hair strongly predict virologic response to treatment. *AIDS.* 2009;23(4):471–8.
  65. Gras A, Schneider S, Karasi J-C, Ternes A-M, Sauvageot N, Karasi-Omes C, et al. Evaluation of saliva as an alternative matrix for monitoring plasma zidovudine, lamivudine and nevirapine concentrations in Rwanda. *Curr HIV Res.* 2011;9(4):223–8.
  66. Gandhi M, Ameli N, Bacchetti P, Anastos K, Gange SJ, Minkoff H, et al. Atazanavir concentration in hair is the strongest predictor of outcomes on antiretroviral therapy. *Clin Infect Dis.* 2011;52(10):1267–75.
  67. Hickey MD, Salmen CR, Tessler RA, Omollo D, Bacchetti P, Magerenge R, et al. Antiretroviral concentrations in small hair samples as a feasible marker of adherence in rural Kenya. *J Acquir Immune Defic Syndr.* 2014;66(3):311–5.
  68. Rakhmanina NY, Capparelli E V, van den Anker JN, Williams K, Sever JL, Spiegel HML, et al. Nevirapine concentration in nonstimulated saliva: an alternative to plasma sampling in children with human immunodeficiency virus infection. *Ther Drug Monit.* 2007;29(1):110–7.
  69. Wintergerst U, Kurowski M, Rolinski B, Muller M, Wolf E, Jaeger H, et al. Use of saliva specimens for monitoring indinavir therapy in human immunodeficiency virus-infected patients. *Antimicrob Agents Chemother.* 2000;44(9):2572–4.
  70. van Heeswijk RP, Veldkamp AI, Mulder JW, Meenhorst PL, Beijnen JH, Lange JM, et al. Saliva as an alternative body fluid for therapeutic drug monitoring of the nonnucleoside reverse transcription inhibitor nevirapine. *Ther Drug Monit.* 2001;23(3):255–8.
  71. Johnston J, Wiesner L, Smith P, Maartens G, Orrell C. Correlation of hair and plasma efavirenz concentrations in HIV-positive South Africans. *South Afr J HIV Med.* 2019;20(1):881.
  72. Murnane PM, Bacchetti P, Currier JS, Brummel S, Okochi H, Phung N, et al. Tenofovir concentrations in hair strongly predict virologic suppression in breastfeeding women. *AIDS.* 2019;33(10):1657–62.
  73. Gandhi M, Devi S, Bacchetti P, Chandy S, Heylen E, Phung N, et al. Measuring adherence to antiretroviral therapy via hair concentrations in India. *J Acquir Immune Defic Syndr.* 2019;81(2):202–6.

74. Chu L, Wu Y, Duan C, Yang J, Yang H, Xie Y, et al. Simultaneous quantitation of zidovudine, efavirenz, lopinavir and ritonavir in human hair by liquid chromatography-atmospheric pressure chemical ionization-tandem mass spectrometry. *J Chromatogr B Anal Technol Biomed Life Sci.* 2018;1097–1098:54–63.
75. Tabb ZJ, Mmbaga BT, Gandhi M, Louie A, Kuncze K, Okochi H, et al. Antiretroviral drug concentrations in hair are associated with virologic outcomes among young people living with HIV in Tanzania. *AIDS.* 2018;32(9):1115–23.
76. Hugen PWH, Burger DM, de Graaff M, ter Hofstede HJM, Hoetelmans RMW, Brinkman K, et al. Saliva as a specimen for monitoring compliance but not for predicting plasma concentrations in patients with HIV treated with indinavir. *Ther Drug Monit.* 2000;22(4):437–45.
77. Gandhi M, Murnane PM, Bacchetti P, Elion R, Kolber MA, Cohen SE, et al. Hair levels of preexposure prophylaxis drugs measure adherence and are associated with renal decline among men/transwomen. *AIDS.* 2017;31(16):2245–51.
78. Pintye J, Bacchetti P, Teeraananchai S, Kerr S, Prasitsuebsai W, Singtoroj T, et al. Brief report: Lopinavir hair concentrations are the strongest predictor of viremia in HIV-infected Asian children and adolescents on second-line antiretroviral therapy. *J Acquir Immune Defic Syndr.* 2017;76(4):367–71.
79. Chawana TD, Gandhi M, Nathoo K, Ngara B, Louie A, Horng H, et al. Defining a cutoff for atazanavir in hair samples associated with virological failure among adolescents failing second-line antiretroviral treatment. *J Acquir Immune Defic Syndr.* 2017;76(1):55–9.
80. Koss CA, Bacchetti P, Hillier SL, Livant E, Horng H, Mgodhi N, et al. Differences in cumulative exposure and adherence to tenofovir in the VOICE, iPrEx OLE, and PrEP demo studies as determined via hair concentrations. *AIDS Res Hum Retroviruses.* 2017;33(8):778–83.
81. Koss CA, Natureeba P, Mwesigwa J, Cohan D, Nzarubara B, Bacchetti P, et al. Hair concentrations of antiretrovirals predict viral suppression in HIV-infected pregnant and breastfeeding Ugandan women. *AIDS.* 2015;29(7):825–30.
82. Yan J, Liu J, Su B, Pan X, Wang Z, Wu J, et al. Lamivudine concentration in hair and prediction of virologic failure and drug resistance among HIV patients receiving free ART in China. *PLoS One.* 2016;11(4):e0154421.
83. Prasitsuebsai W, Kerr SJ, Truong KH, Ananworanich J, Do VC, Nguyen L Van, et al. Using lopinavir concentrations in hair samples to assess treatment outcomes on second-line regimens among Asian children. *AIDS Res Hum Retroviruses.* 2015;31(10):1009–14.
84. Olds PK, Kiwanuka JP, Nansera D, Huang Y, Bacchetti P, Jin C, et al. Assessment of HIV antiretroviral therapy adherence by measuring drug concentrations in hair among children in rural Uganda. *AIDS Care - Psychol Socio-Medical Asp AIDS/HIV.* 2015;27(3):327–32.
85. Baxi SM, Greenblatt RM, Bacchetti P, Jin C, French AL, Keller MJ, et al. Nevirapine concentration in hair samples is a strong predictor of virologic suppression in a prospective cohort of HIV-infected patients. *PLoS One.* 2015;10(6):e0129100.
86. Baxi SM, Liu A, Bacchetti P, Mutua G, Sanders EJ, Kibengo FM, et al. Comparing the novel method of assessing PrEP adherence/exposure using hair samples to other pharmacologic and traditional measures. *J Acquir Immune Defic Syndr.* 2015;68(1):13–20.
87. Kromdijk W, Mulder JW, Smit PM, Ter Heine R, Beijnen JH, Huitema AD, et al. Therapeutic drug monitoring of antiretroviral drugs at home using dried blood spots: A proof-of-concept study.

- Antivir Ther. 2013;18(6):821–5.
88. George L, Muro EP, Ndaro A, Dolmans W, Burger DM, Kisanga ER. Nevirapine concentrations in saliva measured by thin layer chromatography and self-reported adherence in patients on antiretroviral therapy at Kilimanjaro Christian Medical Centre, Tanzania. *Ther Drug Monit.* 2014;36(3):366–70.
  89. Lamorde M, Fillekes Q, Sigaloff K, Kityo C, Buzibye A, Kayiwa J, et al. Therapeutic drug monitoring of nevirapine in saliva in Uganda using high performance liquid chromatography and a low cost thin-layer chromatography technique. *BMC Infect Dis.* 2014;14:473.
  90. Duthaler U, Berger B, Erb S, Battegay M, Letang E, Gaugler S, et al. Using dried blood spots to facilitate therapeutic drug monitoring of antiretroviral drugs in resource-poor regions. *J Antimicrob Chemother.* 2018;73(10):2729–37.
  91. van Schooneveld T, Swindells S, Nelson SR, Robbins BL, Moore R, Fletcher C V. Clinical evaluation of a dried blood spot assay for atazanavir. *Antimicrob Agents Chemother.* 2010;54(10):4124–8.
  92. ter Heine R, Mulder JW, van Gorp ECM, Wagenaar JFP, Beijnen JH, Huitema ADR. Clinical evaluation of the determination of plasma concentrations of darunavir, etravirine, raltegravir and ritonavir in dried blood spot samples. *Bioanalysis.* 2011;3(10):1093–7.
  93. de Truchis P, Le MP, Daou M, Madougou B, Nouhou Y, Saley SM, et al. High efficacy of first-line ART in a West African cohort, assessed by dried blood spot virological and pharmacological measurements. *J Antimicrob Chemother.* 2016;71(11):3222–7.
  94. Yang H, Chu L, Wu Y, Wang W, Yang J, Zhang Q, et al. LC-MS/MS quantification of nevirapine and its metabolites in hair for assessing long-term adherence. *Molecules.* 2020;25(23):5692.
  95. Zhang Q, Li X, Qiao S, Shen Z, Zhou Y. Comparing self-reported medication adherence measures with hair antiretroviral concentration among people living with HIV in Guangxi, China. *AIDS Res Ther.* 2020;17(1):8.
  96. Ngara B, Zvada S, Chawana TD, Stray-Pedersen B, Nhachi CFB, Rusakaniko S. A population pharmacokinetic model is beneficial in quantifying hair concentrations of ritonavir-boosted atazanavir: a study of HIV-infected Zimbabwean adolescents. *BMC Pharmacol Toxicol.* 2020;21(1):58.
  97. de Lastours V, Fonsart J, Burlacu R, Gourmel B, Molina J-M. Concentrations of tenofovir and emtricitabine in saliva: implications for preexposure prophylaxis of oral HIV acquisition. *Antimicrob Agents Chemother.* 2011;55(10):4905–7.
  98. Gandhi M, Greenblatt RM, Bacchetti P, Jin C, Huang Y, Anastos K, et al. A single-nucleotide polymorphism in CYP2B6 leads to >3-fold increases in efavirenz concentrations in plasma and hair among HIV-infected women. *J Infect Dis.* 2012;206(9):1453–61.
  99. Alsous MM, Hawwa AF, McElnay JC. Determination of azathioprine/6-mercaptopurine metabolites in dried blood spots: Correlation with RBC concentrations. *J Pharm Biomed Anal.* 2020;178:112870.
  100. Detrez I, Schops G, Lefrere J, Tops S, van Assche G, Vermeire S, et al. Golimumab dried blood spot analysis (GOUDA): a prospective trial showing excellent correlation with venepuncture samples and more detailed pharmacokinetic information. *AAPS J.* 2018;21(1):10.
  101. Bian S, van den Berghe N, Vandersmissen L, Tops S, Vermeire S, Ferrante M, et al. Evaluating an

- easy sampling method using dried blood spots to determine vedolizumab concentrations. *J Pharm Biomed Anal.* 2020;185:113224.
102. Heiskanen T, Langel K, Gunnar T, Lillsunde P, Kalso EA. Opioid concentrations in oral fluid and plasma in cancer patients with pain. *J Pain Symptom Manage.* 2015;50(4):524–32.
  103. Hardy J, Norris R, Anderson H, O’Shea A, Charles B. Is saliva a valid substitute for plasma in pharmacokinetic studies of oxycodone and its metabolites in patients with cancer? *Support Care Cancer.* 2012;20(4):767–72.
  104. Musshoff F, Lachenmeier K, Trafkowski J, Madea B, Nauck F, Stamer U. Determination of opioid analgesics in hair samples using liquid chromatography/tandem mass spectrometry and application to patients under palliative care. *Ther Drug Monit.* 2007;29(5):655–61.
  105. Idkaidek N, Hamadi S, El-Assi M, Al-Shalalfeh A, Al-Ghazawi A. Saliva versus plasma therapeutic drug monitoring of pregabalin in Jordanian patients. *Drug Res (Stuttg).* 2018;68(10):596–600.
  106. Miguez-Díez E, Modamio P, Vázquez M, Lastra CF, Montes MJ, Retamoso I, et al. Correlation of methadone concentrations in plasma and saliva collected with and without stimulation in pain management patients. *Clin Chem Lab Med.* 2015;53(4):e109–12.
  107. Shaparin N, Mehta N, Kunkel F, Stripp R, Borg D, Kolb E. A novel chronic opioid monitoring tool to assess prescription drug steady state levels in oral fluid. *Pain Med.* 2017;18(11):2162–9.
  108. Kronstrand R, Ahlner J, Dizdar N, Larson G. Quantitative analysis of desmethylselegiline, methamphetamine, and amphetamine in hair and plasma from Parkinson patients on long-term selegiline medication. *J Anal Toxicol.* 2003;27(3):135–41.
  109. Sun X, Wang L, Yang F, Ren J, Jiang P, Liu H, et al. Correlation of hair risperidone concentration and serum level among patients with schizophrenia. *Gen psychiatry.* 2019;32(1):e100042.
  110. Preiskorn J, Studer S, Rauh R, Lukacin R, Geffert C, Fleischhaker C, et al. Interindividual and intraindividual variation of methylphenidate concentrations in serum and saliva of patients with attention-deficit/hyperactivity disorder. *Ther Drug Monit.* 2018;40(4):435–42.
  111. Ebert K, Maurice E, Lukacin R, Fleischhaker C, Schulz E, Ebert D, et al. Serum and saliva concentrations of venlafaxine, O-desmethylvenlafaxine, quetiapine, and citalopram in psychiatric patients. *Ther Drug Monit.* 2018;40(3):351–5.
  112. Neumann J, Beck O, Dahmen N, Boettcher M. Potential of oral fluid as a clinical specimen for compliance monitoring of psychopharmacotherapy. *Ther Drug Monit.* 2018;40(2):245–51.
  113. Kloosterboer SM, De Winter BCM, Bahmany S, Al-Hassany L, Dekker A, Dieleman GC, et al. Dried blood spot analysis for therapeutic drug monitoring of antipsychotics: Drawbacks of its clinical application. *Ther Drug Monit.* 2018;40(3):344–50.
  114. Geers LM, Cohen D, Wehkamp LM, Van Hateren K, Koster RA, Fedorenko OY, et al. Dried blood spot analysis for therapeutic drug monitoring of clozapine. *J Clin Psychiatry.* 2017;78(9):e1211–8.
  115. da Silva ACC, Raasch JR, Vargas TG, Peteffi GP, Hahn RZ, Antunes MV, et al. Simultaneous determination of fluoxetine and norfluoxetine in dried blood spots using high-performance liquid chromatography-tandem mass spectrometry. *Clin Biochem.* 2018;52:85–93.
  116. Böttcher M, Kühne D, Beck O. Compliance testing of patients in ADHD treatment with

- lisdexamphetamine (Elvanse®) using oral fluid as specimen. *Clin Mass Spectrom.* 2019;14:99–105.
117. Sticht G, Sevecke K, Kaferstein H, Dopfner M, Rothschild MA, G. S, et al. Detection of methylphenidate in the hair of children treated with ritalin. *J Anal Toxicol.* 2007;31(9):588–91.
  118. Marchei E, Munoz JA, Garcia-Algar O, Pellegrini M, Vall O, Zuccaro P, et al. Development and validation of a liquid chromatography-mass spectrometry assay for hair analysis of methylphenidate. *Forensic Sci Int.* 2008;176(1):42–6.
  119. Fucci N, De Giovanni N. Methadone in hair and sweat from patients in long-term maintenance therapy. *Ther Drug Monit.* 2007;29(4):452–4.
  120. Cirimele V, Kintz P, Gosselin O, Ludes B. Clozapine dose-concentration relationships in plasma, hair and sweat specimens of schizophrenic patients. *Forensic Sci Int.* 2000;107(1–3):289–300.
  121. Pirro V, Fusari I, Di Corcia D, Gerace E, De Vivo E, Salomone A, et al. Hair analysis for long-term monitoring of buprenorphine intake in opiate withdrawal. *Ther Drug Monit.* 2014;36(6):796–807.
  122. Skopp G, Kniest A, Haisser J, Mann K, Hermann D. Buprenorphine and norbuprenorphine findings in hair during constant maintenance dosage. *Int J Legal Med.* 2011;125(2):277–81.
  123. Weber J, Oberfeld S, Bonse A, Telger K, Lingg R, Hempel G. Validation of a dried blood spot method for therapeutic drug monitoring of citalopram, mirtazapine and risperidone and its active metabolite 9-hydroxyrisperidone using HPLC–MS. *J Pharm Biomed Anal.* 2017;140:347–54.
  124. Dziurkowska E, Wesolowski M. Simultaneous quantitation of venlafaxine and its main metabolite, O-desmethylvenlafaxine, in human saliva by HPLC. *J Sep Sci.* 2013;36(11):1726–33.
  125. Mercolini L, Mandrioli R, Protti M, Conca A, Albers LJ, Raggi MA. Dried blood spot testing: A novel approach for the therapeutic drug monitoring of ziprasidone-treated patients. *Bioanalysis.* 2014;6(11):1487–95.
  126. Wang X, Zhuo Y, Tang X, Qiang H, Liu W, Wu H, et al. Segmental analysis of antidepressant and antipsychotic drugs in the hair of schizophrenic patients. *Drug Test Anal.* 2019;12(4):472–84.
  127. Pappadopulos E, Jensen PS, Chait AR, Arnold LE, Swanson JM, Greenhill LL, et al. Medication adherence in the MTA: Saliva methylphenidate samples versus parent report and mediating effect of concomitant behavioral treatment. *J Am Acad Child Adolesc Psychiatry.* 2009;48(5):501–10.
  128. Fisher DS, Beyer C, Van Schalkwyk G, Seedat S, Flanagan RJ. Measurement of clozapine, norclozapine, and amisulpride in plasma and in oral fluid obtained using 2 different sampling systems. *Ther Drug Monit.* 2017;39(2):109–17.
  129. Flarakos J, Luo W, Aman M, Svinarov D, Gerber N, Vouros P, et al. Quantification of risperidone and 9-hydroxyrisperidone in plasma and saliva from adult and pediatric patients by liquid chromatography-mass spectrometry. *J Chromatogr A.* 2004;1026(1–2):175–83.
  130. Shiran MR, Hassanzadeh-Khayyat M, Iqbal MZ, Lagundoye O, Seivewright N, Lennard MS, et al. Can saliva replace plasma for the monitoring of methadone? *Ther Drug Monit.* 2005;27(5):580–6.
  131. Saracino MA, Marcheselli C, Somaini L, Pieri MC, Gerra G, Ferranti A, et al. A novel test using dried blood spots for the chromatographic assay of methadone. *Anal Bioanal Chem.* 2012;404(2):503–11.
  132. Fisher DS, Van Schalkwyk GI, Seedat S, Curran SR, Flanagan RJ. Plasma, oral fluid, and

- whole-blood distribution of antipsychotics and metabolites in clinical samples. *Ther Drug Monit.* 2013;35(3):345–51.
133. Stegmann B, Dörfelt A, Haen E. Quantification of methylphenidate, dexamphetamine, and atomoxetine in human serum and oral fluid by HPLC with fluorescence detection. *Ther Drug Monit.* 2016;38(1):98–107.
  134. Patteet L, Maudens KE, Morrens M, Sabbe B, Dom G, Neels H. Determination of common antipsychotics in quantisal-collected oral fluid by UHPLC-MS/MS: Method validation and applicability for therapeutic drug monitoring. *Ther Drug Monit.* 2016;38(1):87–97.
  135. Ramírez Fernández MDM, Baumgartner WA, Wille SMR, Farabee D, Samyn N, Baumgartner AM. A different insight in hair analysis: Simultaneous measurement of antipsychotic drugs and metabolites in the protein and melanin fraction of hair from criminal justice patients. *Forensic Sci Int.* 2020;312:110337.
  136. Ransohoff JR, Petrides AK, Piscitello GJ, Flood JG, Melanson SEF. Urine is superior to oral fluid for detecting buprenorphine compliance in patients undergoing treatment for opioid addiction. *Drug Alcohol Depend.* 2019;203:8–12.
  137. Wohkittel C, Högger P, Fekete S, Romanos M, Gerlach M. Relationship between amphetamine concentrations in saliva and serum in children and adolescents with attention-deficit/hyperactivity disorder. *Ther Drug Monit.* 2020;Epub ahead of print.
  138. Manfro ID, Tegner M, Krutzmann ME, Artmann ADC, Brandeburski MR, Peteffi GP, et al. Determination of lithium in dried blood spots and dried plasma spots by graphite furnace atomic absorption spectrometry: Method development, validation and clinical application. *Talanta.* 2020;216:120907.
  139. Angelakis E, Armstrong N, Nappez C, Richez M, Chabriere E, Raoult D. Doxycycline assay hair samples for testing long-term compliance treatment. *J Infect.* 2015;71(5):511–7.
  140. Hawwa AF, AlBawab AQ, Rooney M, Wedderburn LR, Beresford MW, McElney JC. A novel dried blood spot-LCMS method for the quantification of methotrexate polyglutamates as a potential marker for methotrexate use in children. *PLoS One.* 2014;9(2).
  141. Kneepkens EL, Pouw MF, Wolbink GJ, Schaap T, Nurmohamed MT, de Vries A, et al. Dried blood spots from finger prick facilitate therapeutic drug monitoring of adalimumab and anti-adalimumab in patients with inflammatory diseases. *Br J Clin Pharmacol.* 2017;83(11):2474–84.
  142. Brooks E, Tett SE, Isbel NM, McWhinney B, Staatz CE. Prednisolone Concentrations in Plasma (Total and Unbound) and Saliva of Adult Kidney Transplant Recipients. *Ther Drug Monit.* 2019;41(6):755–60.
  143. Brooks E, Tett SE, Isbel NM, McWhinney B, Staatz CE. Investigation of the association between total and free plasma and saliva mycophenolic acid concentrations following administration of enteric-coated mycophenolate sodium in adult kidney transplant recipients. *Clin Drug Investig.* 2019;39(12):1175–84.
  144. Ferreira PCL, Thiesen FV, de Araujo TT, D'Ávila DO, Gadonski G, de Oliveira CSA, et al. Comparison of plasma and oral fluid concentrations of mycophenolic acid and its glucuronide metabolite by LC-MS in kidney transplant patients. *Eur J Clin Pharmacol.* 2019;75(4):553–9.
  145. Ghareeb M, Gohh RY, Akhlaghi F. Tacrolimus concentration in saliva of kidney transplant recipients: Factors influencing the relationship with whole blood concentrations. *Clin*

- Pharmacokinet. 2018;57(9):1199–210.
146. Martial LC, Hoogtanders KEJ, Schreuder MF, Cornelissen EA, Van Der Heijden J, Joore MA, et al. Dried blood spot sampling for tacrolimus and mycophenolic acid in children: Analytical and clinical validation. *Ther Drug Monit.* 2017;39(4):412–21.
  147. Al-Uzri A, Freeman KA, Wade J, Clark K, Bleyle LA, Munar M, et al. Longitudinal study on the use of dried blood spots for home monitoring in children after kidney transplantation. *Pediatr Transplant.* 2017;21(6).
  148. Müller A, Jungen H, Iwersen-Bergmann S, Sterneck M, Andresen-Streichert H, A. M, et al. Analysis of cyclosporin A in hair samples from liver transplanted patients. *Ther Drug Monit.* 2013;35(4):450–8.
  149. Hoogtanders K, van der Heijden J, Christiaans M, Edelbroek P, van Hooff JP, Stolk LML. Therapeutic drug monitoring of tacrolimus with the dried blood spot method. *J Pharm Biomed Anal.* 2007;44(3):658–64.
  150. Wilhelm AJ, Klijn A, Den Burger JCG, Visser OJ, Veldkamp AI, Janssen JJWM, et al. Clinical validation of dried blood spot sampling in therapeutic drug monitoring of ciclosporin a in allogeneic stem cell transplant recipients: Direct comparison between capillary and venous sampling. *Ther Drug Monit.* 2013;35(1):92–5.
  151. Arpini J, Antunes MV, Pacheco LS, Gnatta D, Rodrigues MF, Keitel E, et al. Clinical evaluation of a dried blood spot method for determination of mycophenolic acid in renal transplant patients. *Clin Biochem.* 2013;46(18):1905–8.
  152. Veenhof H, Koster RA, Alffenaar JWC, Berger SP, Bakker SJL, Touw DJ. Clinical validation of simultaneous analysis of tacrolimus, cyclosporine A, and creatinine in dried blood spots in kidney transplant patients. *Transplantation.* 2017;101(7):1727–33.
  153. Hinchliffe E, Adaway J, Fildes J, Rowan A, Keevil BG. Therapeutic drug monitoring of ciclosporin A and tacrolimus in heart-lung transplant patients using dried blood spots. *Ann Clin Biochem.* 2014;51(1):106–9.
  154. Koster RA, Veenhof H, Botma R, Hoekstra AT, Berger SP, Bakker SJ, et al. Dried blood spot validation of five immunosuppressants, without hematocrit correction, on two LC-MS/MS systems. *Bioanalysis.* 2017;9(7):553–63.
  155. Mendonza AE, Gohh RY, Akhlaghi F. Analysis of mycophenolic acid in saliva using liquid chromatography tandem mass spectrometry. *Ther Drug Monit.* 2006;28(3):402–6.
  156. Veenhof H, Koster RA, Alffenaar J-WC, van den Berg AP, de Groot MR, Verschuuren EAM, et al. Clinical application of a dried blood spot assay for sirolimus and everolimus in transplant patients. *Clin Chem Lab Med.* 2019;57(12):1854–62.
  157. Dickerson JA, Sinkey M, Jacot K, Stack J, Sadilkova K, Law YM, et al. Tacrolimus and sirolimus in capillary dried blood spots allows for remote monitoring. *Pediatr Transplant.* 2015;19(1):101–6.
  158. Zwart TC, Gokoel SRM, van der Boog PJM, de Fijter JW, Kweekel DM, Swen JJ, et al. Therapeutic drug monitoring of tacrolimus and mycophenolic acid in outpatient renal transplant recipients using a volumetric dried blood spot sampling device. *Br J Clin Pharmacol.* 2018;84(12):2889–902.
  159. Hoogtanders K, van der Heijden J, Christiaans M, van de Plas A, van Hooff J, Stolk L. Dried blood spot measurement of tacrolimus is promising for patient monitoring. *Transplantation.*



- 2007;83(2):237–8.
160. Mendonza A, Gohh R, Akhlaghi F. Determination of cyclosporine in saliva using liquid chromatography-tandem mass spectrometry. *Ther Drug Monit.* 2004;26(5):569–75.
  161. van Boekel GAJ, Donders ART, Hoogtanders KEJ, Havenith TRA, Hilbrands LB, Aarnoutse RE. Limited sampling strategy for prolonged-release tacrolimus in renal transplant patients by use of the dried blood spot technique. *Eur J Clin Pharmacol.* 2015;71(7):811–6.
  162. Cheung CY, van der Heijden J, Hoogtanders K, Christiaans M, Liu YL, Chan YH, et al. Dried blood spot measurement: application in tacrolimus monitoring using limited sampling strategy and abbreviated AUC estimation. *Transpl Int.* 2008;21(2):140–5.
  163. Koop DR, Bleyle LA, Munar M, Cherala G, Al-Uzri A. Analysis of tacrolimus and creatinine from a single dried blood spot using liquid chromatography tandem mass spectrometry. *J Chromatogr B Anal Technol Biomed Life Sci.* 2013;926:54–61.
  164. Alsmadi MM, Alfarah MQ, Albderat J, Alsalaitya G, AlMardini R, Hamadi S, et al. The development of a population physiologically based pharmacokinetic model for mycophenolic mofetil and mycophenolic acid in humans using data from plasma, saliva, and kidney tissue. *Biopharm Drug Dispos.* 2019;40(9):325–40.
  165. Veenhof H, Koster RA, Junier LAT, Berger SP, Bakker SJL, Touw DJ. Volumetric absorptive microsampling and dried blood spot microsampling vs. conventional venous sampling for tacrolimus trough concentration monitoring. *Clin Chem Lab Med.* 2020;58(10):1687–95.
  166. Martial LC, Kerkhoff J, Martinez N, Rodríguez M, Coronel R, Molinas G, et al. Evaluation of dried blood spot sampling for pharmacokinetic research and therapeutic drug monitoring of anti-tuberculosis drugs in children. *Int J Antimicrob Agents.* 2018;14(56):1–5.
  167. Vu DH, Koster RA, Bolhuis MS, Greijdanus B, Altena R V, Nguyen DH, et al. Simultaneous determination of rifampicin, clarithromycin and their metabolites in dried blood spots using LC-MS/MS. *Talanta.* 2014;121:9–17.
  168. Metcalfe J, Bacchetti P, Gerona R, Esmail A, Dheda K, Gandhi M. Association of anti-tuberculosis drug concentrations in hair and treatment outcomes in MDR- and XDR-TB. *ERJ Open Res.* 2019;5(2):00046–2019.
  169. Mave V, Kinikar A, Kagal A, Nimkar S, Koli H, Khwaja S, et al. Isoniazid concentrations in hair and plasma area-under-the-curve exposure among children with tuberculosis. *PLoS One.* 2017;12(12):e0189101.
  170. Mave V, Chandanwale A, Kinikar A, Khadse S, Kagal A, NGupte N, et al. Isoniazid hair concentrations in children with tuberculosis: A proof of concept study. *Int J Tuberc Lung Dis.* 2016;20(6):844–7.
  171. Gerona R, Wen A, Chin AT, Koss CA, Bacchetti P, Metcalfe J, et al. Quantifying isoniazid levels in small hair samples: A novel method for assessing adherence during the treatment of latent and active tuberculosis. *PLoS One.* 2016;11(5):e0155887.
  172. Ghimire S, Maharjan B, Jongedijk EM, Kosterink JGW, Ghimire GR, Touw DJ, et al. Evaluation of saliva as a potential alternative sampling matrix for therapeutic drug monitoring of levofloxacin in patients with multidrug-resistant tuberculosis. *Antimicrob Agents Chemother.* 2019;63(5).
  173. van den Elsen SHJ, Akkerman OW, Jongedijk EM, Wessels M, Ghimire S, van der Werf TS, et al. Therapeutic drug monitoring using saliva as matrix: an opportunity for linezolid, but challenge for

- moxifloxacin. *Eur Respir J.* 2020;55(5):1901903.
174. van den Elsen SHJ, Akkerman OW, Wessels M, Jongedijk EM, Ghimire S, van der Werf TS, et al. Dose optimisation of first-line tuberculosis drugs using therapeutic drug monitoring in saliva: Feasible for rifampicin, not for isoniazid. *Eur Respir J.* 2020;56(4):2000803.
175. Eisenhut M, Thieme D, Schmid D, Fieseler S, Sachs H. Hair analysis for determination of isoniazid concentrations and acetylator phenotype during antituberculous treatment. *Tuberc Res Treat.* 2012;2012:327027.
